## **Divergent neural pathways emanating from the lateral parabrachial nucleus mediate distinct components of the pain response**

Michael C. Chiang<sup>1,2</sup>, Eileen K. Nguyen<sup>1,2</sup>, Andrew E. Papale<sup>1</sup>, and Sarah E. Ross<sup>1,2\*</sup>

<sup>1</sup>Department of Neurobiology, University of Pittsburgh, Pittsburgh, PA 15213, USA

<sup>2</sup>Pittsburgh Center for Pain Research, University of Pittsburgh, Pittsburgh, PA 15213, USA

\*Corresponding Author and Lead Contact:

Sarah E. Ross  
W1456 Biomedical Science Tower  
200 Lothrop St.  
Pittsburgh, PA 15213  
[saross@pitt.edu](mailto:saross@pitt.edu)

### **HIGHLIGHTS**

Spatially segregated neurons in the IPBN collateralize to distinct targets.

Distinct output pathways give rise to separate aspects of the pain response.

Dynorphin neurons within the IPBN convey noxious information across subdivisions.

### **eTOC BLURB**

Chiang et al. reveal that neurons in spatially segregated regions of the lateral parabrachial nucleus collateralize to distinct targets, and that activation of distinct efferents gives rise to separate components of the nocifensive response.

## **ABSTRACT**

The lateral parabrachial nucleus (IPBN) is a major target of spinal projection neurons conveying nociceptive input into supraspinal structures. However, the functional role of distinct IPBN efferents for diverse nocifensive responses have remained largely uncharacterized. Here, we show that two populations of efferent neurons from different regions of the IPBN collateralize to distinct targets. Activation of efferent projections to the ventromedial hypothalamus (VMH) or lateral periaqueductal gray (IPAG) drive escape behaviors, whereas the activation of IPBN efferents to the bed nucleus stria terminalis (BNST) or central amygdala (CEA) generates an aversive memory. Finally, we provide evidence that dynorphin expressing neurons span cytoarchitecturally distinct domains of the IPBN to coordinate these distinct aspects of the nocifensive response.

## INTRODUCTION

Noxious stimuli elicit a repertoire of innately encoded nocifensive behaviors comprising locomotor actions and affective responses to prevent further potential damage. These stereotyped behavioral sequences shift toward more complex motor actions as the severity of potential damage increases. For example, low intensity noxious stimuli drive withdrawal reflexes, whereas high intensity noxious stimuli recruit escape behaviors and aversive learning. Together, these distinct behavioral responses form a nocifensive response (Browne et al., 2017; Espejo and Mir, 1993; Fan et al., 1995; Le Bars et al., 2001). Despite the importance of the appropriate response for survival, the neural underpinnings of the distinct components that make up the nocifensive response remains to be fully explored.

It is well established that the lateral parabrachial nucleus (IPBN) is a primary target for nociceptive information arising from the spinal cord (Al-Khater and Todd, 2009; Todd et al., 2000). Indeed, the majority of IPBN neurons respond to noxious stimuli ((Bester et al., 1997; Hermanson and Blomqvist, 1996, 1997; Jansen and Giesler, 2015; Menendez et al., 1996). However, the IPBN is not specific to nociception, as it is activated by a wide array of threatening stimuli, such as food neophobia and hypercapnia (Chamberlin and Saper, 1994; Kaur et al., 2013; Kaur et al., 2017; Palmiter, 2018; Saper, 2016). Recently, the contribution of a specific population of IPBN neurons, those that express calcitonin gene-related peptide (CGRP) neurons, were found to play an important role in fear learning via projections to the central amygdala (Campos et al., 2018; Han et al., 2015). However, these CGRP neurons represent only a portion of the projections from the IPBN. Given that so many IPBN neurons respond to noxious stimulation, we sought to gain a clearer understanding of its efferents and how their activity might contribute to the response to noxious stimuli.

In this study, we investigated the varying contributions of distinct IPBN efferents to the bed nucleus stria terminalis (BNST), central amygdala (CEA), ventromedial hypothalamus (VMH), and lateral periaqueductal gray (IPAG). We found that subsets of neurons in spatially segregated regions within the IPBN collateralize to distinct targets. Optogenetic manipulation of these specific outputs recapitulates specific components of a nocifensive response. Furthermore, we characterize a previously unspecified local IPBN circuit involving dynorphin neurons that are activated by noxious stimuli and may convey this information across IPBN subdivisions to mediate aversion.

## RESULTS

Nociceptive information is conveyed from the spinal cord to multiple regions of the brain in parallel, including brainstem, midbrain and forebrain structures (Todd, 2010). Although the IPBN is a major target of the anterolateral tract in murine species (Cameron et al., 2015; Todd, 2010; Todd et al., 2000), its relative contribution to pain behaviors has only recently been explored (Alhadeff et al., 2018; Barik et al., 2018; Huang et al., 2018; Rodriguez et al., 2017). To further address this issue, we tested whether transiently inhibiting the IPBN would affect the behavioral response to noxious stimuli. For these experiments, adenoassociated virus (AAV) encoding a Cre-dependent channelrhodopsin2 (ChR2) or enhanced yellow fluorescent protein (eYFP) was targeted into inhibitory neurons in IPBN using the *Gad2<sup>cre</sup>* allele to enable light-activated inhibition (Figures 1A and 1B). In the absence of light, both ChR2 and eYFP mice showed capsaicin-induced mechanical hypersensitivity. However, this hypersensitivity was significantly reduced when the IPBN was photostimulated in ChR2 mice compared to eYFP controls (Figure 1C). These data suggest that activity within the IPBN is required for mechanical allodynia.

Given the necessity of the IPBN for this pain behavior, we next explored its efferent targets. Towards this end, an AAV encoding a Cre-GFP fusion protein was stereotaxically delivered into the IPBN of mice harboring two Cre-dependent alleles: ReaChR-mCitrine, for the purpose of visualizing axonal projections, and synaptophysin-tdTomato, for the purpose of visualizing presynaptic terminals (Figure 1D). We observed IPBN efferent projections to numerous regions of the brain (Figure S1), consistent with previous studies (Bernard et al., 1996; Bernard et al., 1994; Gauriau and Bernard, 2002; Saper and Loewy, 1980). However, four targets in particular stood out due to the robust projections from mCitrine-labeled axons and dense puncta from tdtomato-labeled synaptic terminals: the BNST, the CEA, the VMH, and the IPAG (Figures 1E and 1F). Quantification revealed that all four of these regions received significant synaptic input from the IPBN (Figure 1G), though the apparent perisomatic input to the BNST and CEA (arrows) was qualitatively different from the diffuse input observed within the VMH and IPAG (arrowheads; Figure 1F). Together, these data indicate that the BNST, CEA, VMH, and IPAG are four principle efferent targets of the IPBN (Figure 1H).

Next, we sought to investigate the cellular basis of these efferent projections in more detail. In particular, we considered whether there might be parallel pathways originating from distinct cell types within the IPBN (Figure 2A), which would be consistent with previous work suggesting that distinct subdivisions of the LBPBN have distinct projection patterns (Fulwiler and Saper, 1984; Saper and Loewy, 1980). Alternatively, given that at least some IPBN efferents are known to collateralize (Tokita et al., 2010), we also considered the possibility of a single major output from the IPBN with multiple targets (Figure 2B). To distinguish between these possibilities, we characterized the projections from the IPBN using cholera toxin B subunit (CTB) as a retrograde tracing tool (Figure 2C). Intriguingly, we found that stereotaxic injection

of CTB into distinct IPBN targets labeled neuronal cell bodies in different sub-regions of the IPBN: retrograde tracing from BNST or CEA resulted in labeled neurons within the external lateral division (eIPBN), whereas retrograde tracing from VMH or IPAG labeled neurons within the dorsal division (dIPBN) (Figure 2D). These findings suggested the existence of at least two populations of efferent neurons with distinct targets.

To further explore this idea, we performed dual retrograde labeling experiments, placing distinct CTB conjugates into different target regions through stereotaxic injections. Following dual targeting of CEA and BNST, we found that ~40% of labeled neurons in the IPBN were double-labeled with both CTB-conjugated fluorophores (Figure 2E). Analogously, following dual injection into the VMH and IPAG, ~30% of CTB-containing neurons in the IPBN were double-labeled (Figure 2F). In contrast, there was almost no double labeling of IPBN neurons upon dual injections into any of the other four pair-wise combinations (Figures 2G, 2H, 2I and 2J). Together, these data define two major efferent pathways from the IPBN: one originating from the dIPBN that collateralizes to the VMH and IPAG, and a second arising from the eIPBN that collateralizes to the BNST and CEA (Figure 2K).

In light of these findings, we next determined whether distinct outputs from the IPBN mediate different components of the nocifensive response. To address this question, we targeted the IPBN with AAVs encoding either ChR2 or eYFP and implanted optical fibers above distinct efferent targets, thereby enabling pathway-selective stimulation (Figure 3A). For each mouse, behavioral experiments and post-hoc analysis of tissue for infection specificity in the IPBN and optical placement over the efferent target were performed in a blinded manner. In addition, pathway specificity was confirmed by analyzing the induction of Fos, a marker of neuronal activity, in response to optogenetic stimulation (Figure S2).

Several lines of evidence suggest that nociceptive threshold is determined, at least in part, by descending modulation from brain structures such as the PAG that are activated by ascending nociceptive circuitry (Basbaum and Fields, 1978). To explore whether any of the efferent projections from the IPBN are sufficient to activate descending inhibition, we assessed whether optogenetic stimulation affected the latency to withdraw in the tail flick assay, which measures a spinal reflex to noxious heat (Figure 3B). At baseline, Chr2-expressing mice exhibited similar tail flick latencies compared to eYFP controls. However, immediately following optogenetic activation of dPBN projections to IPAG, Chr2-expressing mice showed a significant increase in tail flick latency (Figure 3C). Indeed, over half of these mice reached cut-off, which was imposed to prevent tissue damage. In contrast, photostimulation of projections to other efferent targets had either no significant effect (VMH or CEA) or only a small effect (BNST) (Figures S3A, S3B and S3C). Thus, activation of the efferent pathway from the IPBN to the IPAG is sufficient to elicit robust analgesia through descending inhibition.

Over the course of these studies, we noted that activation of some efferent pathways elicited motor behaviors. To examine this phenomenon in more detail, we quantified the lateral (Figure 2D; running) and vertical (Figure 2G; jumping) movements that were observed upon optogenetic stimulation. Activation of the efferent projection from the dPBN to the IPAG resulted in explosive running behavior that was time-locked to the light stimulus (Figure 3E). Likewise, stimulation of the projection to the VMH elicited dramatic increases in locomotion that began each time the light was turned on and ceased as soon as the light was turned off (Figure 3F). In contrast, photostimulation of efferent projections to the CEA caused no significant lateral movement (Figure S3D), and that to the BNST showed significant lateral movement to the first stimulation only (Figure S2E). Thus, efferent projections from the dPBN

were distinctive in their ability to elicit switch-like locomotor behavior in response to repeated stimulation.

Analogous results were found in the jumping assay, where significant effects were observed upon activation of efferents originating from the dPBN, but not the eIPBN. Upon activation of projections to either the IPAG or the VMH, a significant proportion of mice (50%) jumped as many as 35 times over a minute of stimulation (Figures 3H and 3I). In contrast, jumping behavior upon activation of the efferent pathways to either the BNST or the CEA was not significantly different than that observed in eYFP controls (Figures S3F and S3G). Taken together, these findings suggest that the efferent pathways emanating from the dPBN are sufficient to elicit a group of behaviors — running, jumping and analgesia — that would enable escape in the context of injury or other threats (Figure 3I).

Another important component of the response to noxious input is aversion that provides a salient cue to enable avoidance learning. We therefore addressed the degree to which efferent pathways from the IPBN elicit avoidance using a real-time place aversion assay (Figure 4A). As before, experiments were performed on mice in which AAVs encoding either ChR2 or eYFP had been stereotaxically injected into the IPBN and optical fibers were implanted above one of the four efferent targets — CEA, BNST, VMH or IPAG — to enable pathway-selective activation. Notably, regardless of which IPBN efferent pathway that was targeted, ChR2-expressing mice spent significantly less time on the side of the chamber in which they received photostimulation (Figures 4B, 4C, 4D, 4E and 4F).

Although this behavior was suggestive of aversion, we also considered the possibility that at least in some instances (i.e., VMH and PAG) this apparent avoidance could simply be a consequence of optogenetically-induced locomotion. Thus, to more directly assess whether



activation of efferent pathways from the IPBN was sufficient to enable associative conditioning, we used the conditioned place aversion (CPA) assay, in which optogenetic stimulation was selectively paired with one of the two chambers for 20 min on two consecutive days (Figure 4G). When activation of efferent projections to the CEA was the conditioning stimulus, ChR2-expressing mice spent significantly less time on the stimulation-paired side of the chamber (Figure 2H). Similarly, significant CPA was observed when activation of projections to the BNST was used as the conditioning stimulus (Figure 4I). In contrast, repeated photostimulation of efferent projections to either the VMH or the IPAG failed to induce CPA (Figures S3A and S3B). These findings suggest that, although activation of any of the the major outputs from the IPBN results (directly or indirectly) in real time place aversion (RTPA), only those projecting to the CEA or BNST are sufficient for stable aversive learning. To further explore how quickly the mice learned to avoid the side of the chamber in which they receive optogenetic stimulation, we re-analyzed the real time place aversion data, quantifying number of entries into the light-paired chamber. Photostimulation of the efferent projection to the CEA significantly reduced the number of entries (Figure 4J), whereas activation of other efferent projections had no significant effect on entries (Figures S4C, S4D and S4E). These findings reinforce the role of projections to the CEA for avoidance learning because only this cohort of mice showed evidence of learning to avoid the light-paired chamber during the RTPA assay. Together, these data suggest that avoidance memory can be elicited by efferent pathways from the eIPBN (Figure 4K), consistent with previous studies (Campos et al., 2018; Chen et al., 2018; Han et al., 2015; Sato et al., 2015).

Having examined the outputs from the IPBN that could mediate the behavioral responses to noxious stimuli, we next characterized the nociceptive inputs to this nucleus. Towards this end, we used the *NK1R<sup>creER</sup>* allele (Huang et al., 2016) to visualize neurokinin 1 receptor-

expressing spinoparabrachial neurons, which are known to transmit noxious signals from the spinal cord to the brain (Cameron et al., 2015; Todd, 2010). To visualize the innervation of the IPBN by these neurons, an AAV encoding a Cre dependent fluorescent reporter was injected into the L4-L6 region of the spinal cord of *NK1R<sup>creER</sup>* mice (Figure 5A). We found that *NK1R<sup>creER</sup>* neurons showed dense innervation of the IPBN that was regionally constrained, with the vast majority of these terminals targeting the dPBN and very few targeting the eIPBN (Figure 5B), consistent with previous studies (Harrison et al., 2004). To ensure that this observation was not specific to *NK1R<sup>creER</sup>* neurons, we repeated this experiment using a constitutive AAV to label all spinoparabrachial neurons. Again, we saw the same distribution of input from the spinal cord, which was predominant in the dPBN, but not the eIPBN (Figures 5C).

The paucity of direct nociceptive input to the eIPBN was somewhat curious to us in light of previous studies that showed direct innervation of eIPBN neurons by spinoparabrachial neurons (Cechetto et al., 1985; Feil and Herbert, 1995; Ma and Peschanski, 1988). Indeed, we found that both the dPBN and eIPBN subregions showed significant Fos induction in response to noxious stimulation induced via capsaicin treatment of the hindpaw (Figures 5D and 5E), consistent with previous results (Bernard et al., 1994; Hermanson and Blomqvist, 1996). However, the presynaptic terminals of *NK1R<sup>creER</sup>* spinoparabrachial neurons were only observed in close apposition to Fos+ neurons within the dPBN (Figure 5F).

The apparent discrepancy between the localized nature of the nociceptive input in the dPBN and the widespread nature of the Fos induction by intraplantar capsaicin raised the question of how noxious information reaches the eIPBN. With the goal of identifying a neuronal population that might convey nociceptive information between IPBN subregions, we investigated cell types that are known to be expressed in the dPBN using a combination of Cre alleles and

stereotaxic injection of Cre dependent AAV reporters to visualize these cells and their projections. In total, six alleles were screened: *SST<sup>cre</sup>*; *NK1R<sup>creER</sup>*, *NTS<sup>cre</sup>*, *CR<sup>cre</sup>*, *CRH<sup>cre</sup>* and *pDyn<sup>cre</sup>* alleles. Although all of these genetic tools uncovered populations of neurons with subregion-specific expression in the IPBN (Figure S5), only the dynorphin population showed localization and anatomy that positioned them to convey noxious information from the dPBN to the eIPBN. In particular, using dual fluorescent in situ hybridization (FISH), we found *Pdyn* neurons were located almost exclusively in the dorsal region of the IPBN (Figure 5I), consistent with previous studies (Geerling et al., 2016). Next, we validated the *pDyn<sup>cre</sup>* allele, confirming that Cre-dependent AAV viruses injected into the IPBN of these mice selectively targeted *Pdyn*-expressing neurons (Figure S6A). Finally, using this allele to visualize dynorphin-expressing neurons, we found that dynorphin neurons in dPBN project to the eIPBN (Figure 5J). Thus, dynorphin-expressing neurons have cell bodies in the dPBN and send prominent projections to the eIPBN.

To further investigate the putative role of dynorphin neurons in nociceptive processing, we used a viral strategy to determine whether spinoparabrachial neurons directly innervate the *pDyn<sup>cre</sup>* subset of dPBN neurons. *pDyn<sup>cre</sup>* mice were stereotaxically injected with AAV encoding a Cre-dependent PSD95-eYFP into the IPBN and another encoding a constitutive synaptophysin-tdtomato into the spinal cord (Figure 6A). These efforts revealed presynaptic terminals from spinal output neurons that were in close apposition to PSD95-eYFP in *pDyn<sup>cre</sup>* neurons, suggestive of direct synaptic contacts. Moreover, we found that intraplantar injection of capsaicin gave rise to strong Fos induction in *pDyn<sup>cre</sup>* neurons. Specifically, 75% of Fos-expressing cells belonged to the *pDyn<sup>cre</sup>* population and Fos was induced in 50% of these cells

(Figure 6B). Together, these data provide anatomical and functional evidence that *pDyn<sup>cre</sup>* neurons in the dPBN receive noxious input via spinoparabrachial neurons.

To characterize these *pDyn<sup>cre</sup>* neurons in more detail, we next examined whether this population represented an excitatory or inhibitory population of neurons through dual fluorescent in situ hybridization (FISH). We found that nearly all *Pdyn* transcript colocalized with *Vglut2*, with *Pdyn* cells representing approximately one-quarter of the excitatory population within the dPBN (Figure 6C). In contrast, there was very little to no overlap of *Pdyn* and the inhibitory marker *Vgat* (Figure S6B). Thus, from a neurochemical standpoint, dynorphin neurons in the dPBN are positioned to relay nociceptive information to the eIPBN.

To further investigate whether dynorphin neurons could provide a cellular substrate for transmission of nociceptive information to eIPBN efferents, we used viral and retrograde tracing approaches to determine whether *pDyn<sup>cre</sup>* neurons form anatomical connections with eIPBN neurons that project to CEA and BNST. Towards this end, we stereotaxically injected AAV encoding a Cre-dependent synaptophysin-eYFP into dPBN together with CTB into either the CEA or BNST of *pDyn<sup>cre</sup>* mice (Figure 6D). These experiments suggested that approximately two-thirds of CTB-labeled cells from either the BNST or the CEA receive synaptic input from *pDyn<sup>cre</sup>* neurons as supported by the close apposition of retrogradely labeled cells to synaptophysin-eYFP and the post-synaptic density marker Homer1 (Figures 6E and 6F). These data provide anatomical support for the idea that *pDyn<sup>cre</sup>* neurons may convey noxious information to neurons in the eIPBN that have efferent projections to the CEA and/or BNST.

To further test the idea that *pDyn<sup>cre</sup>* neurons in the dPBN convey information to the eIPBN, we next examined whether activation of this population is sufficient to elicit the behavioral responses that are mediated by eIPBN efferents. To manipulate these cells, we

delivered an AAV encoding Cre-dependent ChR2 or eYFP into the IPBN of *pDyn<sup>cre</sup>* mice. Consistent with our hypothesis, we found that photostimulation of *pDyn<sup>cre</sup>* neurons in the IPBN mice gave rise to aversive behaviors, but not escape behaviors. In particular, optogenetic stimulation resulted in real time place aversion coupled with a significant reduction in number of entries into the stimulation chamber (Figures 6G and 6H). In contrast, the activation of *pDyn<sup>cre</sup>* neurons had no effect on escape behaviors including running, jumping or tail flick latency (Figures S6C, S6D and S6E). These data highlight that *pDyn<sup>cre</sup>* neurons serve a crucial link for the recruitment of eIPBN pathways to CEA and BNST.

## Discussion

We have identified two anatomically and functionally distinct populations of IPBN neurons that underlie different aspects of the nocifensive response. In dPBN, neurons receive direct input from spinal projection neurons and mediate behaviors that would enable escape. In eIPBN, neurons are activated by a neurochemically defined population of dPBN neurons that express dynorphin and mediate aversive learning. Together, these findings provide evidence for a neural substrate that coordinates diverse behavioral responses to noxious stimuli (Figure 6I).

Although this study explores the idea that different efferent pathways from the IPBN mediate different components of the pain response, we acknowledge that such a model is undoubtedly an oversimplification of the complex and interconnected circuitry underlying these behaviors. The optogenetic approach used herein provides a new level of specificity by directly activating IPBN efferents at a given target. However, multiple brain regions are likely to have been affected indirectly as a consequence of this manipulation. For instance, efferents from the BNST project back to the IPBN, as well as to the CEA, the IPAG, the RVM, and numerous other

brain structures (Barik et al., 2018; Rodriguez et al., 2017; Tokita et al., 2009). Consistent with this interconnectivity, we found that photostimulation of a single efferent pathway activates multiple brain regions, as evidenced by Fos induction. It is therefore not surprising that some behaviors were not completely specific to the activation of a particular IPBN projection. Most notably, stimulation of efferents to the BNST elicited small but significant escape responses (running and analgesia), in addition to aversive learning. Nevertheless, the broad findings of our study are consistent with a modular output from the IPBN that would enable the coordination of nocifensive responses in a context-dependent manner.

It is intriguing that distinct IPBN efferents would be predicted to have opposite effects on the pain experience: those emanating from the dorsal division would be expected to decrease pain, while those from the external lateral domain would be expected to exacerbate pain. The efferent pathway from the dPBN might predominate in the context of an emergency to help avoid injury, whereas the efferent pathway from the eIPBN might predominate once imminent danger has past to facilitate aversive learning. The neural substrate for the coordination of different efferent responses in this way is poorly understood. Our work suggests that *pDyn<sup>Cre</sup>* neurons may be involved in this coordinated regulation between efferent projections emanating from the dorsal and external lateral domains, respectively. Our data reveal that *pDyn<sup>Cre</sup>* neurons have cell bodies in the dPBN but send extensive projections to the eIPBN and, consistent with this anatomy, we find that these cells are activated by noxious input and drive aversion, but not escape behaviors. However, we note that this is unlikely to be the only function of *pDyn<sup>Cre</sup>* cells in the IPBN because these neurons have been shown to play important roles in temperature homeostasis (Geerling et al., 2016; Nakamura and Morrison, 2008, 2010). These findings raise the possibility that *pDyn<sup>Cre</sup>* neurons in the IPBN are not a single, homogeneous population. In

future studies, it will be important to characterize this heterogeneity in more detail to identify bona fide cell types and characterize how each responds to diverse stimuli.

More than any other species, humans have a detailed cortical representation that informs conscious perception of pain. But this cortico-centric view of pain may overlook the fundamental idea that avoiding tissue damage is a primal need for which subcortical pathways play a central role. Our studies highlight a potentially important role of dynorphin in the IPBN in this regulation. Because chronic pain has such a profound effect on mental health and well-being, further studies investigating changes in this circuitry in the context of chronic pain and the possible role of dynorphin signaling therein are warranted.

## **STAR METHODS**

### **Animals**

Mice were given free access to food and water and housed under standard laboratory conditions. The use of animals was approved by the Institutional Animal Care and Use Committee of the University of Pittsburgh. *Pdyn-IRES-Cre* (Krashes et al., 2014), *Gad2-IRES-Cre* (Taniguchi et al., 2011), *NK1R-CreER* (Huang et al., 2016), *Ai34(RCL-Syp/tdT)-D*, and *Rosa26 CAG-LSL-ReaChR-mCit* (Hooks et al., 2015) were obtained from Jackson Laboratory. Wild-type C57BL/6 mice were obtained from Charles River (Cat # 027). For all experiments 8 – 16 week-old male and female mice were used. In all cases, no differences between male and female mice were observed and so the data were pooled. Age-matched littermates were used for all behavioral experiments that involved mice harboring the knock-in allele Cre-recombinase.

### **Viruses:**

The following viruses were used for experimentation: AAV2-hsyn-eYFP (Addgene: 50465), AAV2-hSyn-hChR2(H134R)-eYFP (Addgene: 26973), AAV2-EF1a-DIO-eYFP (Addgene: 27056), AAV2-EF1a-DIO-hChR2(H134R)-eYFP (Addgene: 20298), AAV9-CAGGS-FLEX-ChR2-tdtomato.WRPE.SV40 (Addgene: 18917), AAV8.2-hEF1a-DIO-synaptophysin-eYFP (MGH: AAV-RN2), AAV8.2-hEF1a-DIO-PSD95-eYFP (MGH: AAV-RN7), and AAV8.2-hEF1a-synaptophysin-mCherry (MGH: AAV-RN8). Viruses were purchased from University of North Carolina Vector Core, University of Pennsylvania Vector Core, and Massachusetts Gene Technology Core.

### **Stereotaxic injections and implantation of optical fiber**

Animals were anesthetized with 2% isoflurane and placed in a stereotaxic head frame. Ophthalmic ointment was applied to the eyes. The scalp was shaved, local antiseptic applied (betadine), and a midline incision made to expose the cranium. The skull was aligned using cranial fissures. A drill bit (MA Ford, #87) was used to create a burr hole and custom made metal needle (33 gauge) loaded with virus was subsequently inserted through the hole to the injection site. Virus was infused at a rate of 100nL/min using a Hamilton syringe with a microsyringe pump (World Precision Instruments). Wildtype mice received 0.150  $\mu$ l of virus. All other Cre-expressing mice received 0.5  $\mu$ l virus. The injection needle was left in place for an additional 5-10 min and then slowly withdrawn. Injections and optical fiber implantations were performed bilaterally at the following coordinates for each brain region: BNST: AP +0.50 mm, ML  $\pm$  1.00 mm, DV -4.30; CEA: AP -1.20 mm, ML  $\pm$  2.85 mm, DV -4.50; VMH: AP -1.48 mm ML  $\pm$  -0.50 mm DV -5.80 mm; IPAG: AP -4.70 mm, ML  $\pm$  0.74 mm, DV: -2.75; and IPBN AP -5.11 mm, ML  $\pm$  1.25 mm, DV: -3.25. For implantation of optical fibers (Thor Labs: 1.25 mm ceramic



ferrule 230  $\mu\text{m}$  diameter), implants were slowly lowered 0.300-0.500 mm above the site of injection and secured to the skull with a thin layer of Vetbond (3M) and dental cement. The incision was closed using Vetbond and animals were given a subcutaneous injection of buprenorphine (0.3mg/kg) and allowed to recover over a heat pad. Mice were given 4 weeks to recover prior to experimentation.

### **RNAscope in situ hybridization**

Multiplex fluorescent in situ hybridization was performed according to the manufacturer's instructions (Advanced Cell Diagnostics #320850). Briefly, 18  $\mu\text{m}$ -thick fresh-frozen sections containing the parabrachial nucleus were fixed in 4% paraformaldehyde, dehydrated, treated with protease for 15 minutes, and hybridized with gene-specific probes to mouse *Pdyn* (#318771), *Slc32a1* (#319191), and *Slc17a6* (#319171). DAPI (#320858) was used to visualize nuclei. 3-plex positive (#320881) and negative (#320871) control probes were tested. Two to three 18  $\mu\text{m}$  z-stacked sections were quantified for a given mouse, and 2 – 4 mice were used per experiment.

### **Immunohistochemistry**

Mice were anesthetized with an intraperitoneal injection of urethane, transcardially perfused, and post-fixed at least four hours in 4% paraformaldehyde. 40 or 65  $\mu\text{m}$  thick transverse brain or spinal cord sections were collected on a vibratome and processed free-floating for immunohistochemistry. Sections were blocked at room temperature for two hours in a 10% donkey serum, 0.1% triton, 0.3M NaCl in phosphate buffered saline. Primary antisera was incubated for 14 hours overnight at 4°C (except for rabbit anti-Homer1, detailed below): rabbit

anti-c-Fos (1:5K), mouse NeuN (1:1K), chicken anti-GFP (1:1K), rabbit anti-NK1R (1:1K), and rabbit anti-Homer1 (1:1K, incubated for 3 days). Sections were subsequently washed three times for 20 minutes in wash buffer (1% donkey serum, 0.1% triton, 0.3M NaCl) and incubated in secondary antibodies (Life Technologies, 1:500) at room temperature for two hours. Sections were then incubated in Hoechst (ThermoFisher, 1:10K) for 1 minute and washed 7 times for 15 minutes in wash buffer, mounted and coverslipped.

### **CTB backlabeling:**

Fluorescently conjugated cholera toxin subunit B-Alexa-fluor conjugates -555 and -647 (CTB, ThermoFisher C34778, C22843) were stereotactically injected (0.2  $\mu$ l, 1mg/ml) into the brain regions of interest and subsequently analyzed 10 days following injection. Mice were perfused and brains were processed as described above for immunohistochemistry. CTB-labeled cells were quantified using 65  $\mu$ m z-stacked images at 2  $\mu$ m steps of the entire IPBN (n = 3 – 5 mice per backlabeled region). For retrograde labeling of cells and quantification of pre- and post-synaptic markers, 3 – 4 40  $\mu$ m sections were quantified for a given animal, and 4 mice were used per experiment.

### **Image acquisition and quantification.**

Full-tissue thickness sections were imaged using either an Olympus BX53 fluorescent microscope with UPlanSApo 4x, 10x, or 20x objectives or a Nikon A1R confocal microscope with 20X or 60X objectives. All images were quantified and analyzed using ImageJ. For all images, background pixel intensity was subtracted as calculated from control mice. To quantify the area of synapses observed, confocal images using single optical planes were converted into a binary scale and area of signal taken as a ratio of the total area (one section per region of interest,

n = 6 mice). To quantify CTB-labeled cells in tracing experiments, confocal images were manually quantified using full-tissue thickness z-stacked images at 2  $\mu\text{m}$  steps of the entire IPBN (3 – 4 mice per group). To quantify images in RNAscope in situ hybridization experiments, confocal images of tissue samples (1 – 2 sections per mouse over 2 – 4 mice) were imaged and only cells whose nuclei were clearly visible by DAPI staining and exhibited fluorescent signal were counted. To quantify Fos-labeled cells, 65  $\mu\text{m}$  sections of the entire IPBN were imaged using the fluorescent microscope and images manually counted.

### **Fos induction (intraplantar capsaicin)**

Fos induction was performed as previously described in (Rodriguez et al., 2017). Mice were lightly anesthetized with isoflurane and received one of the following treatments: handled (no injection), 10  $\mu\text{l}$  unilateral intraplantar saline, or 10  $\mu\text{l}$  unilateral intraplantar capsaicin (0.03% capsaicin w/v in 2.5% Tween 80 and 2.5% ethanol in PBS). Mice were then placed back into their cages and subsequently perfused 90 minutes later and neural tissue collected according to protocol for immunohistochemistry.

### **Behavior**

All assays were performed and scored by an experimenter blind to virus (eYFP or ChR2). Post hoc analysis confirming specificity of viral injections and proper fiber implantation were also performed blinded to animal identity, and mice in which viral injections and/or fiber implantation were considered off target excluded from analysis. All testing was performed in the University of Pittsburgh Rodent Behavior Analysis Core. Optogenetic stimulation parameters were determined empirically as follows: 10mW, 20Hz, 5ms duration pulses.

### **Real time place aversion assay (RTPA)**

Mice were stereotaxically injected with either channelrhodopsin or control eYFP virus and optical fibers implanted at the downstream terminals of interest. Four weeks following injection mice were habituated to a custom-made 2-chamber (40cm x 28cm x 20cm chamber) for real time place aversion testing. Mice were habituated on day 1 for 20 minutes and subsequently tested the next day for 20 minutes. Light stimulation was delivered whenever the mouse entered one of two sides of the chamber and turned off when the animal exited that chamber. The side of stimulation was counterbalanced. The behavior was recorded and post-hoc analysis performed to determine body position using the open source software Optimouse (Ben-Shaul, 2017). Position data were discarded according to established criteria, and velocity was computed as described here (<https://www.biorxiv.org/content/10.1101/558643v1>).

### **Tail immersion test**

Mice were habituated to mice restraints 15 minutes for 5 days before testing. Tails were immersed 3 cm into a water bath at 48°C or 55°C, and the latency to tail flick was measured three times per temperature with a 1 minute interval between trials. For optogenetic testing, mice were photostimulated for 10 seconds prior to tail immersion testing.

### **Escape response test**

Mice were placed in an open field chamber and allowed to habituate for five minutes before two 30-second optogenetic stimulation bouts and two minute resting period between bouts. The behavior was recorded and post-hoc analysis performed to determine body position using the open source software Optimouse as described in RTPA.

### **Conditioned place aversion test**

Mice were placed in a two-chamber plexiglass box for 20 minutes and allowed to freely roam between one of two sides differentiated by visual cues (spots versus stripes). For two conditioning days, mice were restricted to one of two sides and received either no stimulation or photostimulation (3 seconds on, 2 seconds off at 20Hz, 5ms pulse duration, 10mW) for 20 minute periods in the morning and afternoon. On the test day, mice were placed back into the box and allowed to freely explore either chamber. The behavior was recorded and post-hoc analysis performed to determine body position using the open source software Optimouse as described in RTPA.

### **Mechanical allodynia**

Mice were allowed to habituate for at least two hours prior to testing. Mice received a 10ul intraplantar injection of 0.03% capsaicin dissolved in 2.5% Tween, 2.5% ethanol in PBS and tested for mechanical hypersensitivity via the up-down method (Chaplan et al., 1994). After 5-10 minute resting period, mice were optogenetically stimulated and tested for mechanical hypersensitivity. Mice were again allowed to rest for 5-10 minutes before von Frey testing for post-stimulation effects on mechanical hypersensitivity.

### **Intraspinal injections**

Mice were anesthetized with 100mg/kg ketamine and 10 mg/kg xylazine. An incision was made at the spinal cord level corresponding to L4-6 dermatome. The intrathecal space was exposed, and two injections of approximately 1µl of virus was infused 300 µm below the surface of the

spinal cord at 100nL/min via glass pipette through the intrathecal space corresponding to L4-6 of the spinal cord. The glass pipette was left in place for an additional 5 minutes before withdrawal. The incision was closed with 5-0 vicryl suture. Buprenorphine was delivered post-surgery at 0.3mg/kg subcutaneously, and mice were allowed to recover over a heat pad.

### **Statistical analyses**

All statistical analyses were performed using GraphPad Prism 7.0. Values are presented as mean  $\pm$  SEM. Statistical significance was assessed using Fisher's exact test for categorical data, Students t-test, or two-way repeated measures ANOVA followed by Holm-Sidak post-hoc test. Significance was indicated by  $p \leq 0.05$ . Sample sizes were based on pilot data and are similar to those typically used in the field.

Data availability. The data collected in this study are available from the corresponding author upon request.

Code availability. All custom-written MatLab code used in this study is available upon request.

### **SUPPLEMENTAL INFORMATION**

Supplemental information includes 6 figures.

### **ACKNOWLEDGEMENTS**

We thank Hannah E. Piston for generating equipment for tail flick assay and Michael S. Gold for helpful comments. Research reported in this publication was supported by the Virginia Kaufman Endowment Fund, NIH/NIAMS grant AR063772, NIH/NINDS grant NS096705 (S.E.R.), NRSA F30 grant F30NS096860 and NIGM/NIH T32GM008208 (M.C.C).

### **AUTHOR CONTRIBUTIONS**

Conceptualization: M.C.C and S.E.R.

Methodology: M.C.C, E.K.N, A.E.P and S.E.R.

Investigation: M.C.C and S.E.R.

Writing: M.C.C and S.E.R.

Funding Acquisition: M.C.C and S.E.R.

### **CONFLICTS OF INTEREST**

The authors declare no competing interests.

### **CONTACT FOR REAGENT AND RESOURCE SHARING**

Further information and requests for resources and reagents should be directed to and will be fulfilled by the corresponding authors and Lead Contacts, Dr. Sarah E. Ross ([saross@pitt.edu](mailto:saross@pitt.edu)).

## REFERENCES

- Al-Khater, K.M., and Todd, A.J. (2009). Collateral projections of neurons in laminae I, III, and IV of rat spinal cord to thalamus, periaqueductal gray matter, and lateral parabrachial area. *J Comp Neurol* 515, 629-646.
- Alhadeff, A.L., Su, Z., Hernandez, E., Klima, M.L., Phillips, S.Z., Holland, R.A., Guo, C., Hantman, A.W., De Jonghe, B.C., and Betley, J.N. (2018). A Neural Circuit for the Suppression of Pain by a Competing Need State. *Cell* 173, 140-152 e115.
- Barik, A., Thompson, J.H., Seltzer, M., Ghitani, N., and Chesler, A.T. (2018). A Brainstem-Spinal Circuit Controlling Nocifensive Behavior. *Neuron* 100, 1491-1503 e1493.
- Basbaum, A.I., and Fields, H.L. (1978). Endogenous pain control mechanisms: review and hypothesis. *Ann Neurol* 4, 451-462.
- Ben-Shaul, Y. (2017). OptiMouse: a comprehensive open source program for reliable detection and analysis of mouse body and nose positions. *BMC Biol* 15, 41.
- Bernard, J.F., Bester, H., and Besson, J.M. (1996). Involvement of the spino-parabrachio - amygdaloid and -hypothalamic pathways in the autonomic and affective emotional aspects of pain. *Prog Brain Res* 107, 243-255.
- Bernard, J.F., Huang, G.F., and Besson, J.M. (1994). The parabrachial area: electrophysiological evidence for an involvement in visceral nociceptive processes. *J Neurophysiol* 71, 1646-1660.
- Bester, H., Besson, J.M., and Bernard, J.F. (1997). Organization of efferent projections from the parabrachial area to the hypothalamus: a Phaseolus vulgaris-leucoagglutinin study in the rat. *J Comp Neurol* 383, 245-281.
- Browne, L.E., Latremoliere, A., Lehnert, B.P., Grantham, A., Ward, C., Alexandre, C., Costigan, M., Michoud, F., Roberson, D.P., Ginty, D.D., *et al.* (2017). Time-Resolved Fast Mammalian Behavior Reveals the Complexity of Protective Pain Responses. *Cell Rep* 20, 89-98.
- Cameron, D., Polgar, E., Gutierrez-Mecinas, M., Gomez-Lima, M., Watanabe, M., and Todd, A.J. (2015). The organisation of spinoparabrachial neurons in the mouse. *Pain* 156, 2061-2071.
- Campos, C.A., Bowen, A.J., Roman, C.W., and Palmiter, R.D. (2018). Encoding of danger by parabrachial CGRP neurons. *Nature* 555, 617-622.
- Cechetto, D.F., Standaert, D.G., and Saper, C.B. (1985). Spinal and trigeminal dorsal horn projections to the parabrachial nucleus in the rat. *J Comp Neurol* 240, 153-160.
- Chamberlin, N.L., and Saper, C.B. (1994). Topographic organization of respiratory responses to glutamate microstimulation of the parabrachial nucleus in the rat. *J Neurosci* 14, 6500-6510.
- Chaplan, S.R., Bach, F.W., Pogrel, J.W., Chung, J.M., and Yaksh, T.L. (1994). Quantitative assessment of tactile allodynia in the rat paw. *J Neurosci Methods* 53, 55-63.
- Chen, J.Y., Campos, C.A., Jarvie, B.C., and Palmiter, R.D. (2018). Parabrachial CGRP Neurons Establish and Sustain Aversive Taste Memories. *Neuron* 100, 891-899 e895.
- Espejo, E.F., and Mir, D. (1993). Structure of the rat's behaviour in the hot plate test. *Behav Brain Res* 56, 171-176.
- Fan, R.J., Shyu, B.C., and Hsiao, S. (1995). Analysis of nocifensive behavior induced in rats by CO<sub>2</sub> laser pulse stimulation. *Physiol Behav* 57, 1131-1137.
- Feil, K., and Herbert, H. (1995). Topographic organization of spinal and trigeminal somatosensory pathways to the rat parabrachial and Kolliker-Fuse nuclei. *J Comp Neurol* 353, 506-528.
- Fulwiler, C.E., and Saper, C.B. (1984). Subnuclear organization of the efferent connections of the parabrachial nucleus in the rat. *Brain Res* 319, 229-259.



- Gauriau, C., and Bernard, J.F. (2002). Pain pathways and parabrachial circuits in the rat. *Exp Physiol* 87, 251-258.
- Geerling, J.C., Kim, M., Mahoney, C.E., Abbott, S.B., Agostinelli, L.J., Garfield, A.S., Krashes, M.J., Lowell, B.B., and Scammell, T.E. (2016). Genetic identity of thermosensory relay neurons in the lateral parabrachial nucleus. *Am J Physiol Regul Integr Comp Physiol* 310, R41-54.
- Han, S., Soleiman, M.T., Soden, M.E., Zweifel, L.S., and Palmiter, R.D. (2015). Elucidating an Affective Pain Circuit that Creates a Threat Memory. *Cell* 162, 363-374.
- Harrison, T.A., Hoover, D.B., and King, M.S. (2004). Distinct regional distributions of NK1 and NK3 neurokinin receptor immunoreactivity in rat brainstem gustatory centers. *Brain Res Bull* 63, 7-17.
- Hermanson, O., and Blomqvist, A. (1996). Subnuclear localization of FOS-like immunoreactivity in the rat parabrachial nucleus after nociceptive stimulation. *J Comp Neurol* 368, 45-56.
- Hermanson, O., and Blomqvist, A. (1997). Subnuclear localization of FOS-like immunoreactivity in the parabrachial nucleus after orofacial nociceptive stimulation of the awake rat. *J Comp Neurol* 387, 114-123.
- Hooks, B.M., Lin, J.Y., Guo, C., and Svoboda, K. (2015). Dual-channel circuit mapping reveals sensorimotor convergence in the primary motor cortex. *J Neurosci* 35, 4418-4426.
- Huang, H., Kuzirian, M.S., Cai, X., Snyder, L.M., Cohen, J., Kaplan, D.H., and Ross, S.E. (2016). Generation of a NK1R-CreER knockin mouse strain to study cells involved in Neurokinin 1 Receptor signaling. *Genesis* 54, 593-601.
- Huang, T., Lin, S.H., Malewicz, N.M., Zhang, Y., Zhang, Y., Goulding, M., LaMotte, R.H., and Ma, Q. (2018). Identifying the pathways required for coping behaviours associated with sustained pain. *Nature*.
- Jansen, N.A., and Giesler, G.J., Jr. (2015). Response characteristics of pruriceptive and nociceptive trigeminoparabrachial tract neurons in the rat. *J Neurophysiol* 113, 58-70.
- Kaur, S., Pedersen, N.P., Yokota, S., Hur, E.E., Fuller, P.M., Lazarus, M., Chamberlin, N.L., and Saper, C.B. (2013). Glutamatergic signaling from the parabrachial nucleus plays a critical role in hypercapnic arousal. *J Neurosci* 33, 7627-7640.
- Kaur, S., Wang, J.L., Ferrari, L., Thankachan, S., Kroeger, D., Venner, A., Lazarus, M., Wellman, A., Arrigoni, E., Fuller, P.M., *et al.* (2017). A Genetically Defined Circuit for Arousal from Sleep during Hypercapnia. *Neuron* 96, 1153-1167 e1155.
- Krashes, M.J., Shah, B.P., Madara, J.C., Olson, D.P., Strohlic, D.E., Garfield, A.S., Vong, L., Pei, H., Watabe-Uchida, M., Uchida, N., *et al.* (2014). An excitatory paraventricular nucleus to AgRP neuron circuit that drives hunger. *Nature* 507, 238-242.
- Le Bars, D., Gozariu, M., and Cadden, S.W. (2001). Animal models of nociception. *Pharmacol Rev* 53, 597-652.
- Ma, W., and Peschanski, M. (1988). Spinal and trigeminal projections to the parabrachial nucleus in the rat: electron-microscopic evidence of a spino-ponto-amygdalian somatosensory pathway. *Somatosens Res* 5, 247-257.
- Menendez, L., Bester, H., Besson, J.M., and Bernard, J.F. (1996). Parabrachial area: electrophysiological evidence for an involvement in cold nociception. *J Neurophysiol* 75, 2099-2116.
- Nakamura, K., and Morrison, S.F. (2008). A thermosensory pathway that controls body temperature. *Nat Neurosci* 11, 62-71.

- Nakamura, K., and Morrison, S.F. (2010). A thermosensory pathway mediating heat-defense responses. *Proceedings of the National Academy of Sciences of the United States of America* *107*, 8848-8853.
- Palmiter, R.D. (2018). The Parabrachial Nucleus: CGRP Neurons Function as a General Alarm. *Trends Neurosci* *41*, 280-293.
- Rodriguez, E., Sakurai, K., Xu, J., Chen, Y., Toda, K., Zhao, S., Han, B.X., Ryu, D., Yin, H., Liedtke, W., *et al.* (2017). A craniofacial-specific monosynaptic circuit enables heightened affective pain. *Nature neuroscience* *20*, 1734-1743.
- Saper, C.B. (2016). The House Alarm. *Cell Metab* *23*, 754-755.
- Saper, C.B., and Loewy, A.D. (1980). Efferent connections of the parabrachial nucleus in the rat. *Brain Res* *197*, 291-317.
- Sato, M., Ito, M., Nagase, M., Sugimura, Y.K., Takahashi, Y., Watabe, A.M., and Kato, F. (2015). The lateral parabrachial nucleus is actively involved in the acquisition of fear memory in mice. *Mol Brain* *8*, 22.
- Taniguchi, H., He, M., Wu, P., Kim, S., Paik, R., Sugino, K., Kvitsiani, D., Fu, Y., Lu, J., Lin, Y., *et al.* (2011). A resource of Cre driver lines for genetic targeting of GABAergic neurons in cerebral cortex. *Neuron* *71*, 995-1013.
- Todd, A.J. (2010). Neuronal circuitry for pain processing in the dorsal horn. *Nat Rev Neurosci* *11*, 823-836.
- Todd, A.J., McGill, M.M., and Shehab, S.A. (2000). Neurokinin 1 receptor expression by neurons in laminae I, III and IV of the rat spinal dorsal horn that project to the brainstem. *Eur J Neurosci* *12*, 689-700.
- Tokita, K., Inoue, T., and Boughter, J.D., Jr. (2009). Afferent connections of the parabrachial nucleus in C57BL/6J mice. *Neuroscience* *161*, 475-488.
- Tokita, K., Inoue, T., and Boughter, J.D., Jr. (2010). Subnuclear organization of parabrachial efferents to the thalamus, amygdala and lateral hypothalamus in C57BL/6J mice: a quantitative retrograde double labeling study. *Neuroscience* *171*, 351-365.

## FIGURE LEGENDS

### **Figure 1. IPBN is required for mechanical hypersensitivity and has four major efferent targets.**

(A) Experimental strategy to drive inhibition in the IPBN. AAVs encoding Cre-dependent ChR2 or eYFP were bilaterally injected into the IPBN of *Gad2<sup>cre</sup>* mice. Representative image depicts expression of ChR2 within the IPBN (outline). Scale bar = 100  $\mu$ m.

(B) Mechanical hypersensitivity was (1) induced through intraplantar injection of capsaicin (10  $\mu$ l, 0.03%) and (2) tested using von Frey filaments.

(C) Paw withdrawal threshold (PWT) was significantly reduced during optogenetic stimulation (blue bar) in ChR2-expressing mice compared to eYFP-expressing controls. Data are mean  $\pm$  SEM (n = 10 – 11 mice per group) \*\* indicates significantly different (two-way RM ANOVA followed by Holm-Sidak post-hoc test: p = 0.008).

(D) Experimental design and representative image of strategy to visualize IPBN neurons, their projections, and their presynaptic terminals. An AAV encoding a Cre-GFP fusion protein was targeted to the IPBN into mice harboring two Cre-dependent alleles, *R26<sup>LSL-ReaChR-mCitrine</sup>* and *R26<sup>LSL-Syn-tdt</sup>*. Scale bar = 100  $\mu$ m.

(E) Projections of the IPBN efferents to four different brain regions, as visualized with ReaChR-mCitrine: BSNT, CEA, VMH and IPAG. Scale bar = 100  $\mu$ m. Images are representative of results from 6 mice.

(F) Synaptic terminals of IPBN efferents at four indicated targets, as visualized with Synaptophysin-tdtomato. Scale bar = 25  $\mu$ m. Arrowheads and arrows denote perisomatic and diffuse input, respectively.

(G) Quantification of synaptic input. The relative number of synapses from IPBN was estimated by quantifying the area of synaptophysin-tdtomato expression within the indicated target. An arbitrary brain region with no synaptophysin-tdtomato expression was used as negative control. Data are mean  $\pm$  SEM and dots represent data points from individual animals (n = 6 mice). Asterisks indicate significantly different than negative control region (one-way RM ANOVA followed by Holm-Sidak post-hoc test; \*\* p < 0.01, \*\*\*\* p < 0.001).

(H) Summary diagram depicting four major efferent targets of IPBN.

**Figure 2. Distinct subpopulations of IPBN collateralize to different forebrain regions.**

(A-B) Models illustrating IPBN efferents as parallel (A) or divergent pathways (B)

(C) Experimental strategy to retrogradely label IPBN efferents with fluorophore-conjugated CTB.

(D) CTB injections into efferent targets (top) and retrogradely labeled cells (bottom) in eIPBN (BSNT and CEA) and dIPBN (VMH and IPAG). Scale bars = 100  $\mu$ m.

(E) Dual injection of CTB into CEA (green) and BNST (red) resulted in colocalized signal in approximately 40% of retrogradely labeled cells (yellow) across entire IPBN. Data are mean  $\pm$  SEM (n = 4 mice). Arrows highlight co-labeled cells. Scale bar = 50  $\mu$ m. Magnification shown in inset. Scale bar = 10  $\mu$ m.

(F) Dual injections of CTB into VMH (blue) and IPAG (purple) resulted in colocalized signal in 30% of retrogradely labeled cells (white) across entire IPBN. Data are mean  $\pm$  SEM (n = 4 mice). Arrows highlight co-labeled cells. Scale bar = 50  $\mu$ m. Magnification shown in inset. Scale bar = 10  $\mu$ m.

(G-J) Very few dual-labeled neurons were observed following dual CTB injections into: CEA and VMH (G); CEA and IPAG (H); BNST and VMH (I); or BNST and IPAG (J). Data are mean  $\pm$  SEM (n = 3 - 4 mice). Scale bar = 50  $\mu$ m.

(K) Summary diagram illustrating two collateral pathways emerging from IPBN.

### **Figure 3. Efferent dPBN projections to VMH and IPAG elicit escape-like behaviors**

(A) Experimental strategy to selectively activate distinct IPBN projections. AAVs encoding either ChR2 or eYFP were injected into the IPBN and optical implants were placed above one of four efferent targets: IPAG, VMH, CEA or BNST.

(B) Experimental protocol for tail flick assay (TFA). Mice were photostimulated for 10 s immediately prior to TFA at either 48 °C and 55 °C.

(C) Photostimulation of dPBN terminals in IPAG significantly increases latency to tail flick at 48 °C and 55 °C. Data are mean  $\pm$  SEM and dots represent data points from individual animals (n = 9 – 11 mice per group). \*\*\*\* indicates significantly different (Two-way RM ANOVA followed by Holm-Sidak post-hoc test; IPAG,  $p < 0.0001$ ). Dotted lines indicate cut-off latencies that were imposed to prevent tissue damage.

(D) Experimental protocol for running assay. Stimulation paradigm and example traces of locomotion following stimulation of IPAG terminals from IPBN efferents in eYFP and ChR2 mice.

(E) Photostimulation of dPBN terminals in IPAG significantly increases locomotion. Data are mean  $\pm$  SEM (n = 9 – 11 mice per group). \*\*\*\* indicates significantly different (Two-way ANOVA followed by Holm-Sidak post-hoc test,  $p < 0.0001$ )

(F) Photostimulation of dPBN terminals in VMH significantly increases locomotion. Data are mean  $\pm$  SEM (n = 10 – 12 mice per group). \*\*\*\* indicates significantly different (Two-way ANOVA followed by Holm-Sidak post-hoc test,  $p < 0.0001$ ).

(G) Experimental protocol for jumping assay. A minimum of 6 cm vertical movement of the body was considered a jump.

(H) Photostimulation of dPBN terminals in IPAG elicits significant jumping. Data are mean  $\pm$  SEM and dots represent data points from individual animals (n = 9 – 11 mice per group). Left: \* indicates significant number of jumps (Mann-Whitney;  $p = 0.033$ ). Right: \* indicates significant proportion of mice (Fisher's exact test:  $p = 0.033$ ).

(I) Photostimulation of dPBN terminals in VMH elicits significant jumping. Data are mean  $\pm$  SEM and dots represent data points from individual animals (n = 9 – 11 mice per group). Left: \* indicates significant number of jumps (Mann-Whitney;  $p = 0.015$ ). Right: \* indicates significant proportion of mice (Fisher's exact test:  $p = 0.015$ ).

(J) Summary diagram depicting behavioral responses observed upon stimulation of dPBN efferents to VMH and IPAG.

**Figure 4. Efferent eIPBN projections to BNST and CEA drive aversion.**

(A) Experimental protocol for real time place aversion (RTPA) assay. Mice were habituated (Hab) for 20 min one day prior to testing (Test).

(B) Heat maps of time spent in RTPA chambers upon stimulation of IPBN terminals in CEA in eYFP (left) and ChR2 (right) mice.

(C-F) Time spent in photostimulation chamber during habituation phase (Hab) and testing phase (Test) in eYFP (grey) and ChR2 (blue) mice upon stimulation of IPBN efferent terminals in the

CEA (C), BNST (D), VMH (E) or IPAG (F). Data are mean  $\pm$  SEM and dots represent data points from individual animals (n = 9 – 11 mice per group for each experiment). \*\*\*\* Indicates Chr2 mice are significantly different than eYFP controls (Two-way RM ANOVA followed by Holm-Sidak post-hoc test,  $p < 0.0001$ ).

(G) Experimental protocol for conditioned place aversion (CPA). Each session comprises 20 min in the CPA box.

(H-I). Photostimulation of eIPBN efferent terminals in the CEA (H) or BNST (I) induces CPA. Data are from individual animals (n = 11 - 12 mice per group). \* indicates significantly different (Paired Student's t-test: CEA:  $p = 0.025$ ; BNST:  $p = 0.028$ ).

(F) Entries into photostimulation chamber upon photostimulation of eIPBN efferent terminals in the CEA terminals. \*\* indicates change in entry number between test phase and habituation phase is significantly different between eYFP and Chr2 mice (unpaired Student's t-test,  $p = 0.003$ ).

(J) Summary diagram depicting behavioral responses observed upon stimulation of eIPBN outputs to BNST and CEA.

**Figure 5. Spinoparabrachial input is concentrated in the dPBN, but noxious stimulation drives Fos expression in both dPBN and eIPBN.**

(A) Experimental strategy to visualize spinal inputs into lPBN. An AAV encoding Cre-dependent eYFP (green) or constitutive eYFP (pseudocolored pink) was injected into the spinal cord (L4-L6) in *NK1R<sup>CreER</sup>* or WT mice.

(B-C) Representative image (B) and quantification (C) of the innervation density of efferent terminals in the lPBN from *NK1R<sup>CreER</sup>* spinoparabrachial neurons (SPbN). Data are mean  $\pm$  SEM

and dots represent data points from individual animals ( $n = 3$  mice). \* indicates area of SPbN projections to dPBN (as percent of region) is significantly greater than that to eIPBN (Paired Student's t-test;  $p = 0.036$ ). Scale bar = 100  $\mu\text{m}$ .

(D-E) Representative image (D) and quantification (E) of the innervation density of efferent terminals in the IPBN from all spinoparabrachial neurons. Data are mean  $\pm$  SEM and dots represent data points from individual animals ( $n = 4$  mice). \* indicates area of spinoparabrachial projections to dPBN (as percent of region) is significantly greater than that to eIPBN (Paired Student's t-test;  $p = 0.0094$ ). Scale bar = 100  $\mu\text{m}$ .

(F-G) Representative image (F) and quantification (G) of Fos induction in the dPBN and eIPBN in response to intraplantar saline (10  $\mu\text{l}$ ) or capsaicin (10  $\mu\text{l}$ , 0.03%). Data are mean  $\pm$  SEM and dots represent data points from individual animals ( $n = 4 - 5$  mice per group). Asterisks indicate significantly different (Two-way RM ANOVA followed by Tukey's post-hoc; \*  $p < 0.05$ ; \*\*\*\*  $p < 0.001$ .) Scale bar = 100  $\mu\text{m}$ .

(H) *NK1R<sup>CreER</sup>* spinoparabrachial terminals (visualized through viral expression of eYFP) are found in close apposition to Fos+ cells in the dPBN following intraplantar capsaicin. Image is representative of data from 4 mice. Scale bar = 25  $\mu\text{m}$ .

(I) Representative image and quantification of *pDyn<sup>Cre</sup>* expressing neurons in the dPBN and eIPBN as visualized by FISH ( $n = 4$  mice). Scale bar = 100  $\mu\text{m}$ ; inset: 25  $\mu\text{m}$ .

(J) *pDyn<sup>Cre</sup>* neurons in dPBN project to eIPBN. AAV encoding Cre-dependent ChR2 was injected into IPBN of *pDyn<sup>Cre</sup>* mice to visualize projection. Images are representative of data from at least 4 mice. Scale bar = 100  $\mu\text{m}$ ; inset: 25  $\mu\text{m}$ .



**Figure 6. Dynorphin-expressing neurons may convey nociceptive input from dPBN to eIPBN.**

(A) Spinoparabrachial synaptic inputs are found in close apposition to postsynaptic terminals of dynorphin neurons in dPBN. *pDyn<sup>Cre</sup>* mice were injected with AAVs encoding a Cre-dependent PSD95-eYFP in the IPBN and constitutive synaptophysin-tdtomato in the spinal cord (L4-L6). Image is representative of data from 2 mice.

(B) *pDyn<sup>Cre</sup>* cells express Fos following in response to noxious stimulation. An AAV encoding Cre-dependent eYFP was stereotactically injected into the IPBN to visualize dynorphin+ cells. Mice received intraplantar injections of capsaicin (10  $\mu$ l, 0.03%). Representative image and quantification of the colocalization of Fos+ neurons and *pDyn<sup>Cre</sup>* neurons, as visualized by expression of eYFP. Data are mean  $\pm$  SEM and dots represent data points from individual animals (n = 4 mice). Scale bar = 25  $\mu$ m; inset: 5  $\mu$ m.

(C) Dynorphin cells are primarily excitatory. Representative image and quantification of colocalization between *pDyn* and *Vglut2* mRNA in dPBN, as observed by dual FISH. Data are mean  $\pm$  SEM and dots represent data points from individual animals (n = 3 mice). Arrows denote neurons with colocalized signal. Scale bar = 25  $\mu$ m.

(D) Experimental strategy to visualize *pDyn<sup>Cre</sup>* synaptic inputs onto eIPBN efferents that project to BNST or CEA. CTB was injected into either the BNST or the CEA and Cre-dependent synaptophysin-eYFP was delivered into the IPBN of *pDyn<sup>Cre</sup>* mice.

(E-F). Synaptic terminals from *pDyn<sup>Cre</sup>* neurons (green) are in close apposition to Homer1 puncta (purple) surrounding CTB-labeled neurons that have been backlabeled from the BNST (E; red) or CEA (F; blue). Data are mean  $\pm$  SEM and dots represent data points from individual animals (n = 4 mice per experiment).

(G) Photostimulation of Chr2-expressing *pDyn<sup>Cre</sup>* cells in the dPBN elicits real time place aversion. Data are mean  $\pm$  SEM and dots represent data points from individual animals (n = 9 – 11 mice per group). \*\*\*\* indicates significantly different (Two-way RM ANOVA followed by Holm-Sidak post-hoc test,  $p < 0.0001$ ).

(H) Photostimulation of Chr2-expressing *pDyn<sup>Cre</sup>* cells in the dPBN significantly diminished entry number into the stimulation chamber. Data are mean  $\pm$  SEM and dots represent data points from individual animals (n = 9 – 11 mice per group). \*\*\*\* indicates significantly different (unpaired Student's t-test  $p < 0.0001$ ).

(I) Model: Noxious input is conveyed primarily to the dPBN. Efferents from the dPBN collateralize to VMH and IPAG and mediate behavioral responses that enable escape. Dynorphin neurons in the dPBN convey noxious information to eIPBN. Efferents from the eIPBN collateralize onto the CEA and BNST and mediate aversion and avoidance memory.

## KEY RESOURCES TABLE

| REAGENT or RESOURCE                                          | SOURCE                 | IDENTIFIER                            |
|--------------------------------------------------------------|------------------------|---------------------------------------|
| <b>Antibodies</b>                                            |                        |                                       |
| Rabbit anti-homer 1                                          | Frontier Institute     | Cat: AB_2571774;<br>RRID: AB_2571774  |
| Chicken anti-GFP                                             | Aves Laboratory        | Cat: GFP-1020;<br>RRID: AB_10000240   |
| Rabbit anti-c-fos                                            | Santa Cruz Biotech     | Cat: Sc-52; RRID:<br>AB_216783        |
| Mouse anti-NeuN                                              | Millipore              | Cat: MAB377; RRID:<br>AB_2298772      |
| Rabbit anti-NK1R                                             | Sigma Aldrich          | Cat: SAB4502913;<br>RRID: AB_10746598 |
| Donkey anti-chicken (IgG) Alexa Fluor 488 secondary antibody | Jackson ImmunoResearch | Cat: 703-035-155;<br>RRID: AB_2340375 |
| Donkey anti-rabbit (IgG) Alexa Fluor 555 secondary antibody  | ThermoFisher           | Cat: A-31572; RRID:<br>AB_162543      |
| Donkey anti-mouse (IgG) Alexa Fluor 647                      | ThermoFisher           | Cat: A-31571; RRID:<br>AB_162542      |
| <b>Bacterial and Virus Strains</b>                           |                        |                                       |
| AAV2-hSyn-eYFP                                               | UNC                    | Addgene: 50465                        |
| AAV2-hSyn.hChr2(H134R).eYFP                                  | UNC                    | Addgene: 26973                        |
| AAV2-EF1a-DIO-eYFP                                           | UNC                    | Addgene: 27056                        |
| AAV2-EF1a-DIO-hChr2(H134R)-eYFP                              | UNC                    | Addgene: 20298                        |
| AAV8.2-hEF1a-DIO-synaptophysin-eYFP                          | MGH GTC                | AAV-RN2                               |
| AAV8.2-hEF1a-DIO-PSD95-eYFP                                  | MGH GTC                | AAV-RN7                               |
| AAV8.2-hEF1a-synaptophysin-mCherry                           | MGH GTC                | AAV-RN8                               |
| AAV9-CAGGS-FLEX-ChR2-tdtomato.WRPE.SV40                      | Penn Vector Core       | Addgene: 18917                        |
| <b>Chemicals, Peptides, and Recombinant Proteins</b>         |                        |                                       |
| Cholera toxin subunit B (Recombinant), Alexa Fluor 555       | ThermoFisher           | C34778                                |
| Cholera toxin subunit B (Recombinant), Alexa Fluor 647       | ThermoFisher           | C22843                                |
| PFA                                                          | Sigma Aldrich          | P6148                                 |
| Capsaicin                                                    | Sigma Aldrich          | M2028                                 |
| <b>Critical Commercial Assays</b>                            |                        |                                       |
| <b>RNAscope</b>                                              |                        |                                       |
| Fluorescent multiplex assay                                  | ACD                    | 320850                                |
| <i>Pdyn</i> probe                                            | ACD                    | 318771                                |
| <i>Slc32a1</i> probe                                         | ACD                    | 319191                                |
| <i>Slc17a6</i> probe                                         | ACD                    | 319171                                |
| EYFP probe                                                   | ACD                    | 312131                                |
| DAPI                                                         | ACD                    | 320858                                |
| 3-plex positive control probe                                | ACD                    | 320881                                |
| 3-plex negative control probe                                | ACD                    | 320871                                |
| <b>Experimental Models: Organisms/Strains</b>                |                        |                                       |
| Mouse: C57BL6                                                | Charles River          | 027                                   |

|                                                                                                        |                                                                                                                 |                                                   |
|--------------------------------------------------------------------------------------------------------|-----------------------------------------------------------------------------------------------------------------|---------------------------------------------------|
| Mouse: Pdyn-IRES-Cre<br>B6;129S-Pdyn <sup>tm1.1(cre)Mjkr</sup> /LowJ                                   | Jackson Laboratory<br>Krashes et al. 2014                                                                       | IMSR Cat:<br>JAX:027958; RRID:<br>IMSR_JAX:027958 |
| Mouse: Gad2-IRES-Cre<br>Gad2 <sup>tm2(cre)Zjh</sup> /J                                                 | Jackson Laboratory<br>Taniguchi et al. 2011                                                                     | IMSR Cat:<br>JAX:010802; RRID:<br>IMSR_JAX:010802 |
| Mouse: NK1R <sup>CreER</sup>                                                                           | Ross lab; Huang et al.<br>2016                                                                                  | N/A                                               |
| Mouse: Ai34D or Ai34(RCL-Syp/tdT)-D<br>B6;129S-Gt(ROSA)26Sor <sup>tm34.1(CAG-Syp/tdTomato)Hze</sup> /J | Jackson Laboratory<br>Zeng 2011                                                                                 | IMSR Cat:<br>JAX:012570; RRID:<br>IMSR_JAX:012570 |
| Mouse: Rosa26 CAG-LSL-ReaChR-mCit<br>B6.Cg-Gt(ROSA)26Sor <sup>tm2.2Ksvo</sup> /J                       | Jackson Laboratory<br>Hooks et al. 2015                                                                         | IMSR Cat:<br>JAX:026294; RRID:<br>IMSR_JAX:026294 |
| <b>Software and Algorithms</b>                                                                         |                                                                                                                 |                                                   |
| Prism 7.0                                                                                              | GraphPad                                                                                                        | N/A                                               |
| Matlab                                                                                                 | Mathworks                                                                                                       | N/A                                               |
| Mouse tracking algorithm                                                                               | <a href="https://www.biorxiv.org/content/10.1101/558643v1">https://www.biorxiv.org/content/10.1101/558643v1</a> | N/A                                               |

**Figure 1**

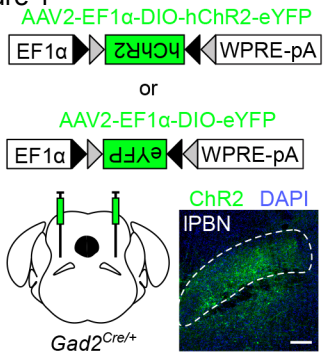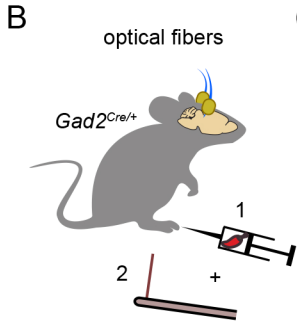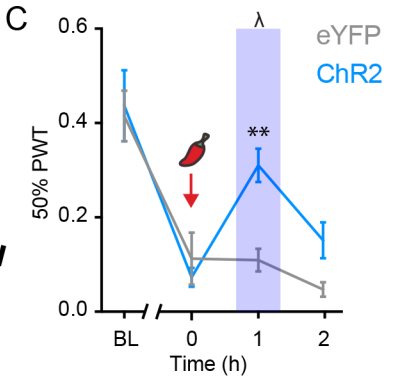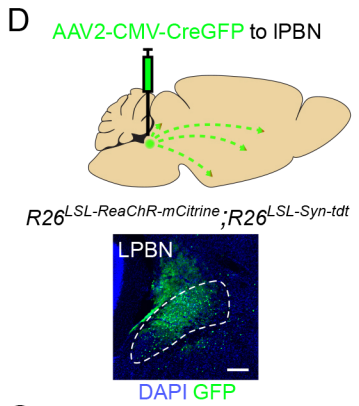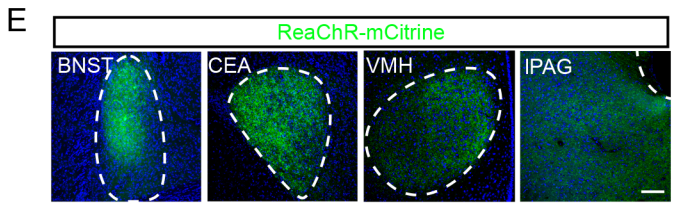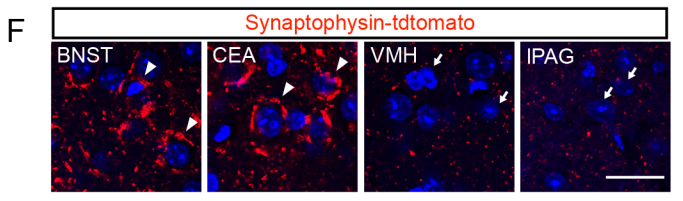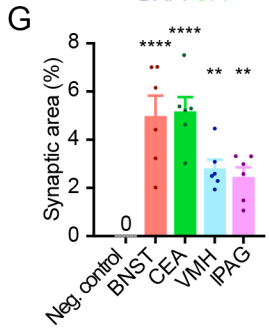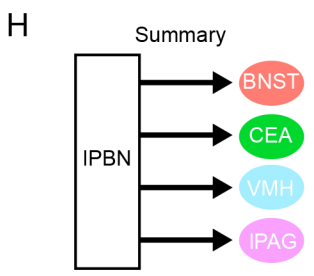

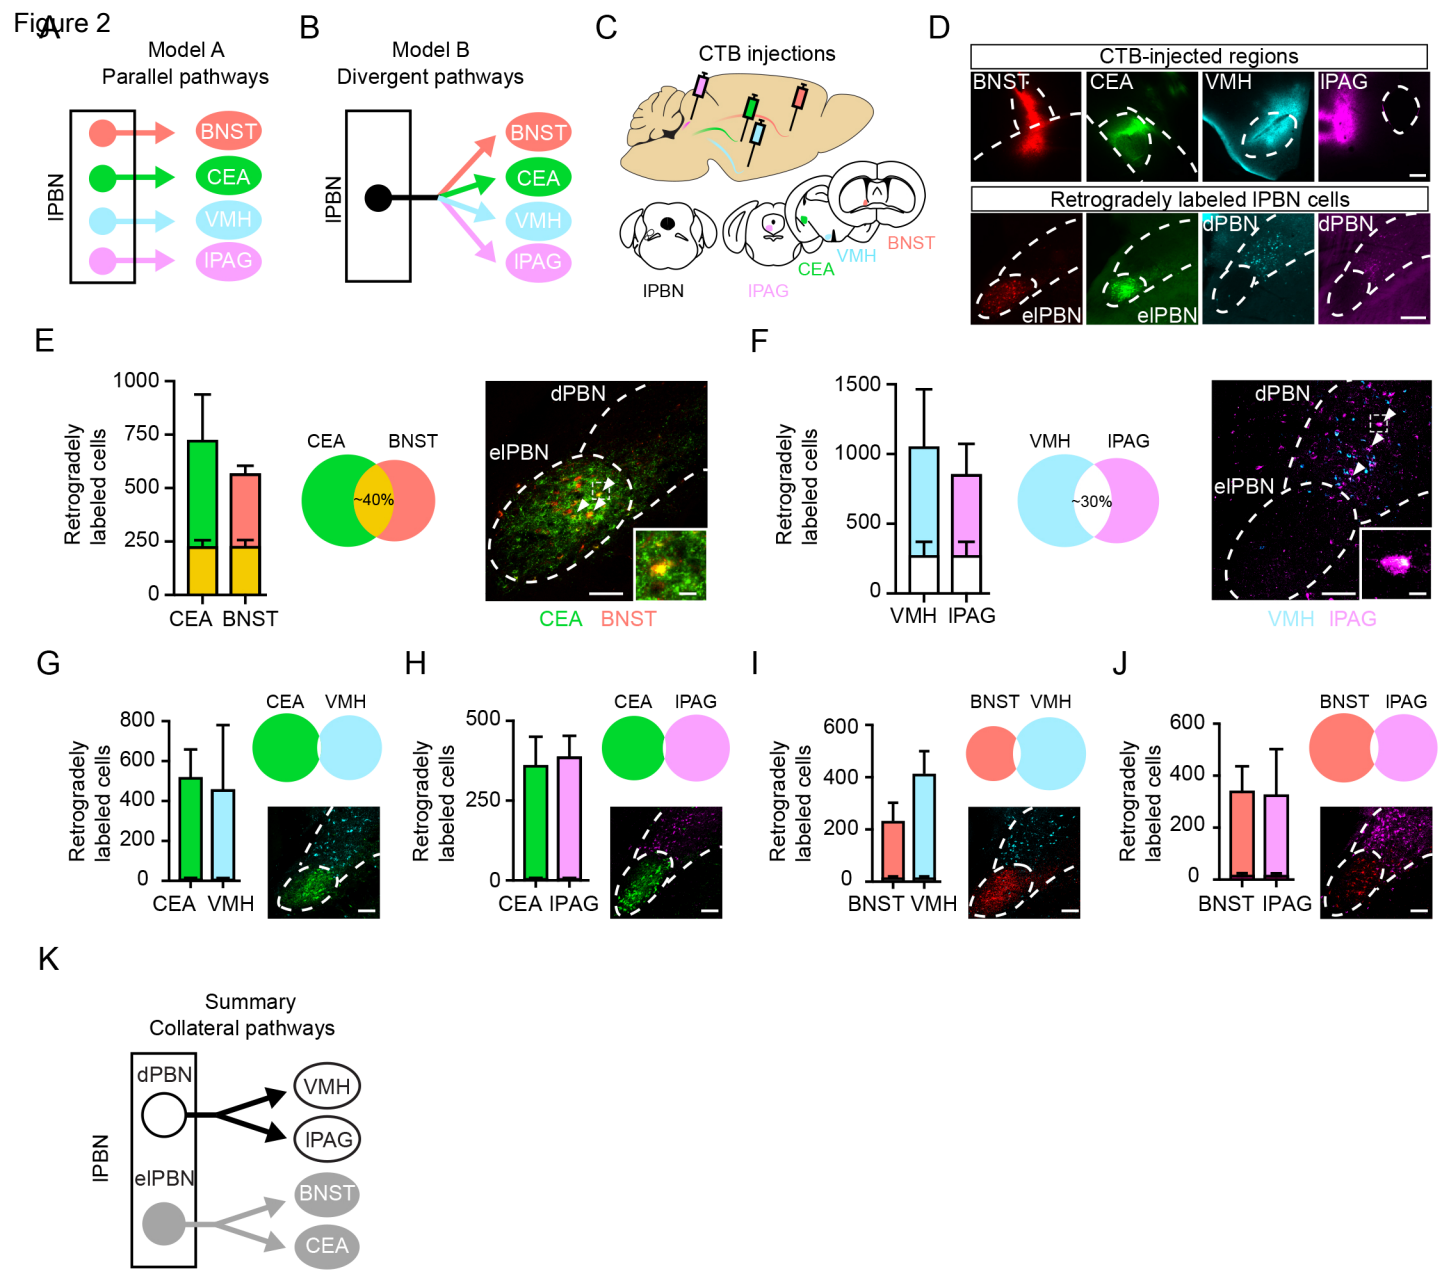

**Figure 3**

**A**

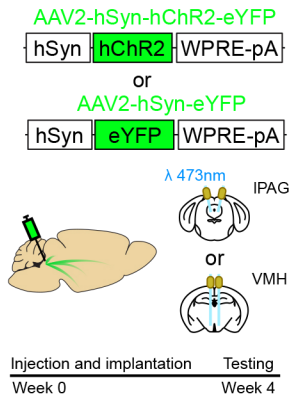

**B**

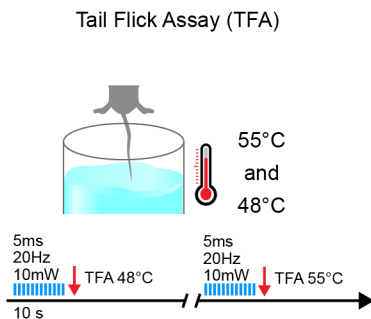

**C**

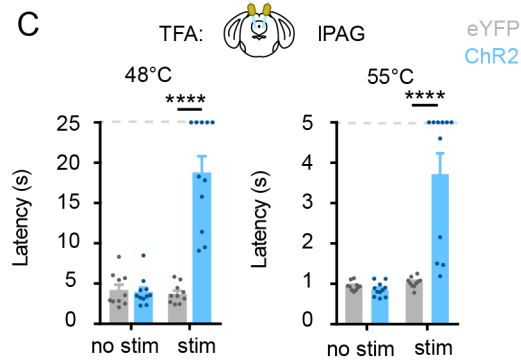

**D**

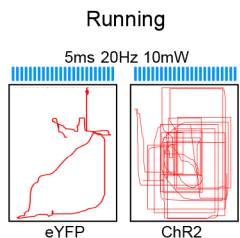

**E**

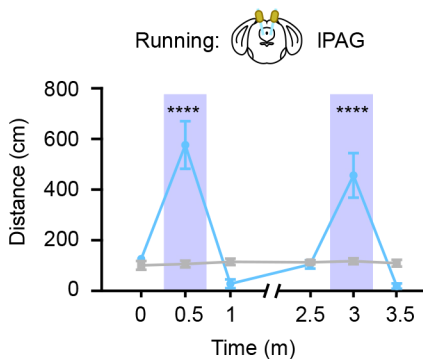

**F**

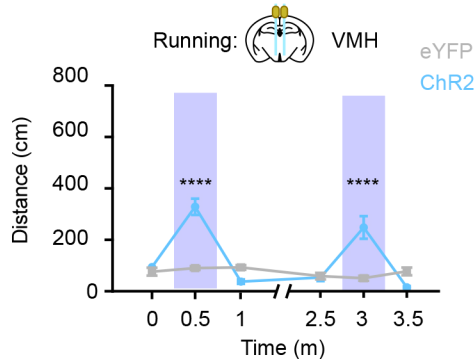

**G**

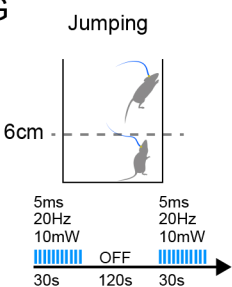

**H**

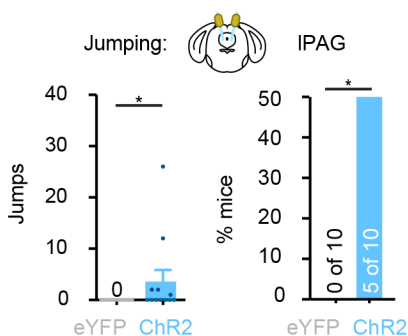

**I**

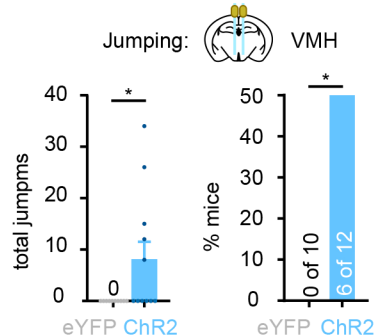

**J**

Escape behaviors

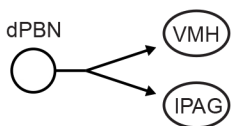

Running  
Jumping

Running  
Jumping  
Analgesia

**Figure 4**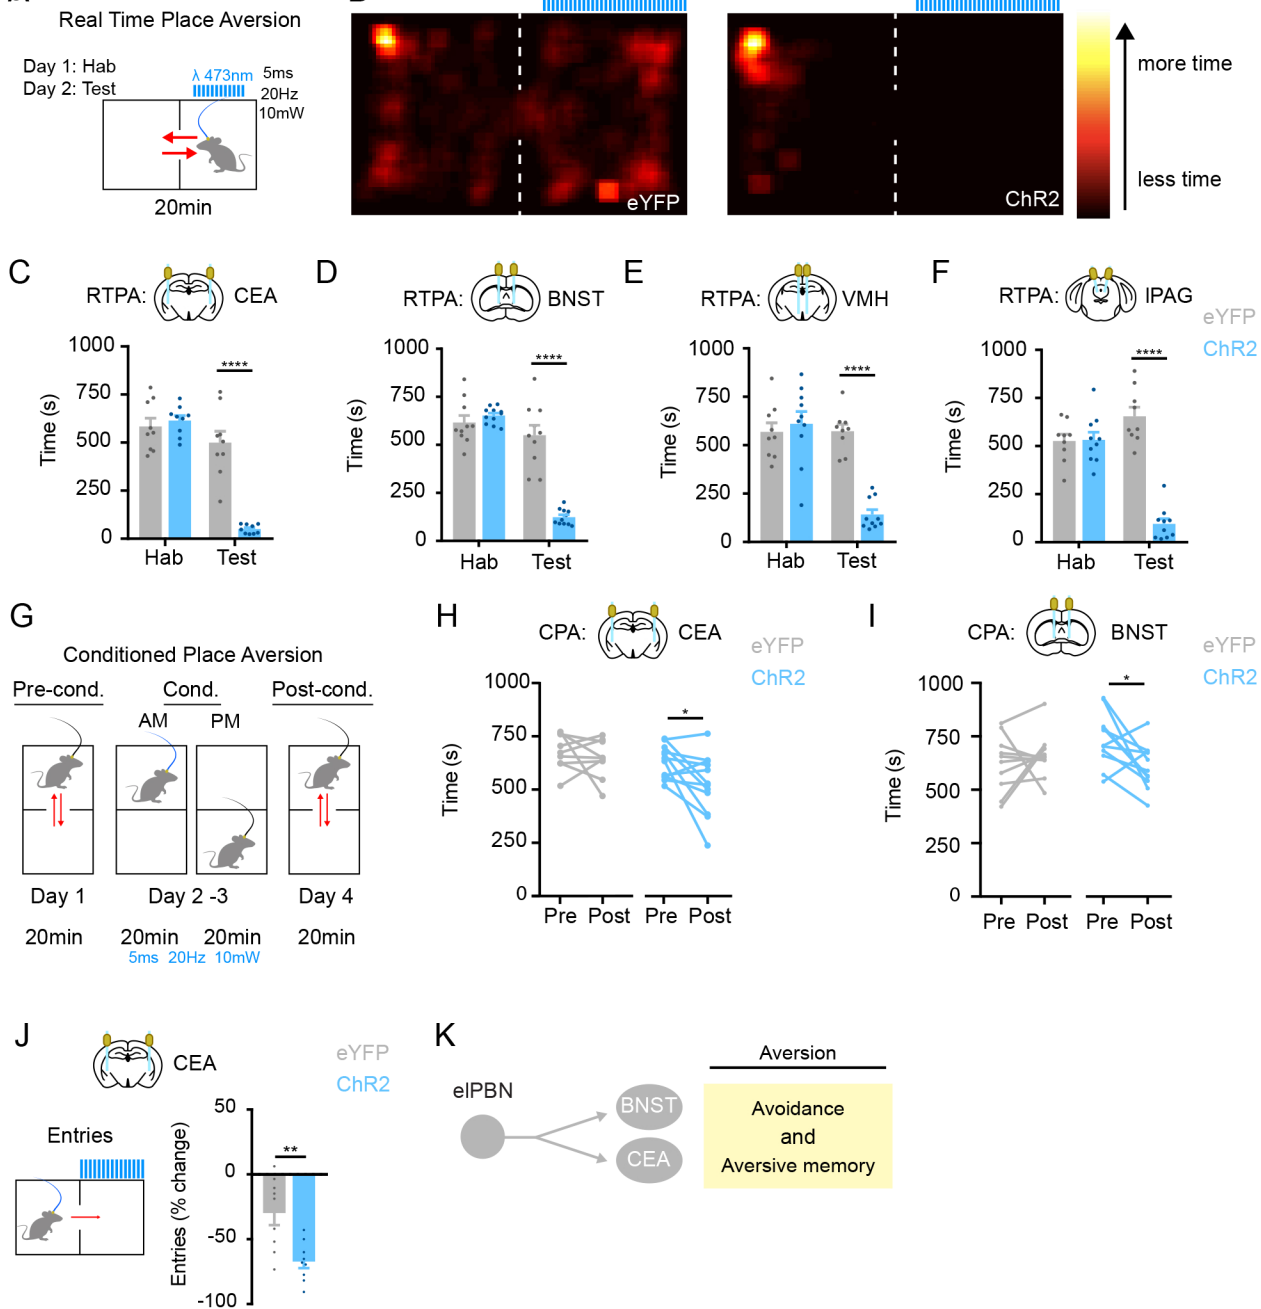



Figure 5

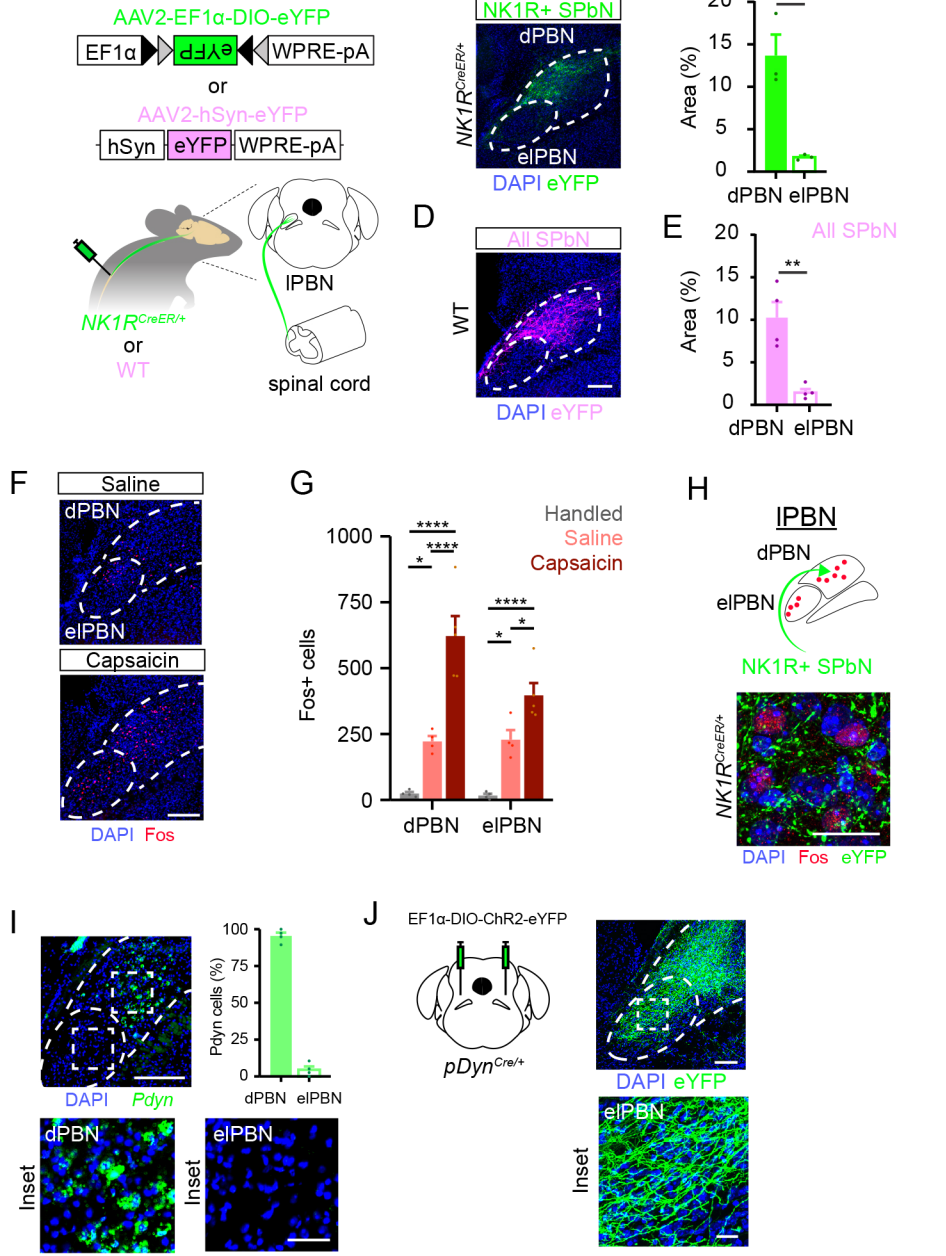

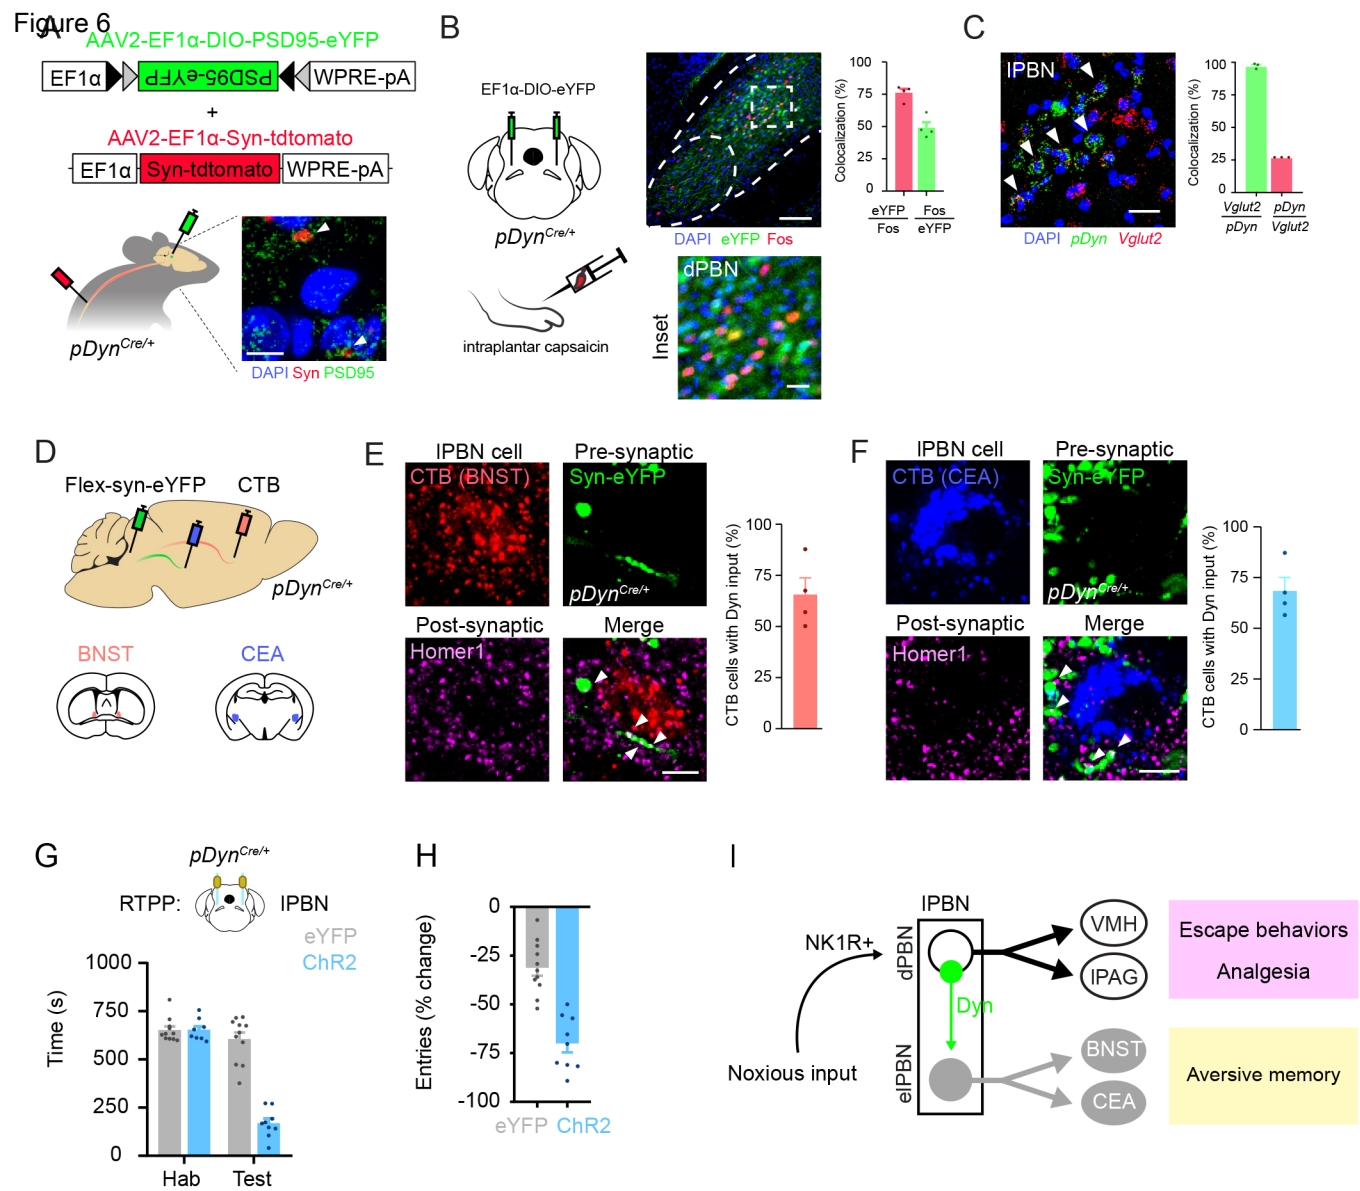

## Supplemental Information

### Divergent neural pathways emanating from the lateral parabrachial nucleus mediate distinct components the pain response

Michael C. Chiang, Eileen K. Nguyen, Andrew E. Papale, and Sarah E. Ross

#### Supplemental Data

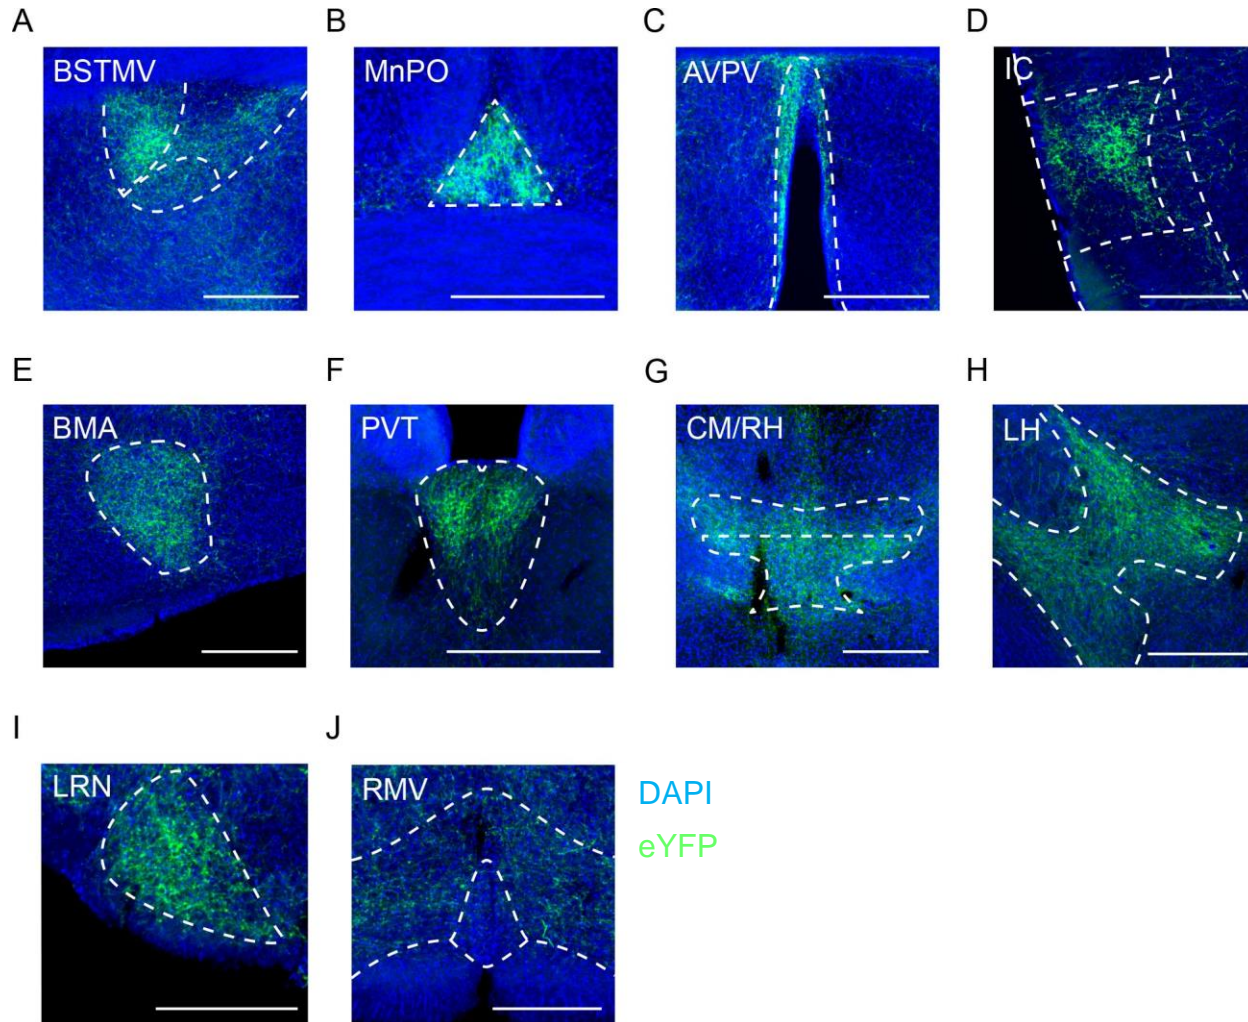

**Figure S1. Efferents from the IPBN target numerous brain regions.**

Efferents from the IPBN targets numerous brain regions, as visualized following stereotaxic injection of an AAV encoding eYFP into the IPBN (0.2  $\mu$ l, bilateral). **(A)** Medial ventral division of bed nucleus stria terminalis (BNSTMV). **(B)** Median preoptic nucleus (MnPO). **(C)** Anteroventral periventricular nucleus (AVPV). **(D)** Insular cortex. **(E)** Basomedial amygdaloid nucleus (BMA). **(F)** Paraventricular thalamic nucleus (PV). **(G)** Centromedial thalamic nucleus (CM) and rhomboid nucleus (RH). **(H)** Lateral hypothalamus (LH). **(I)** Lateral reticular nucleus (LRN). **(J)** Rostral ventromedial medulla (RVM). Scale bar = 200  $\mu$ m (A - J)

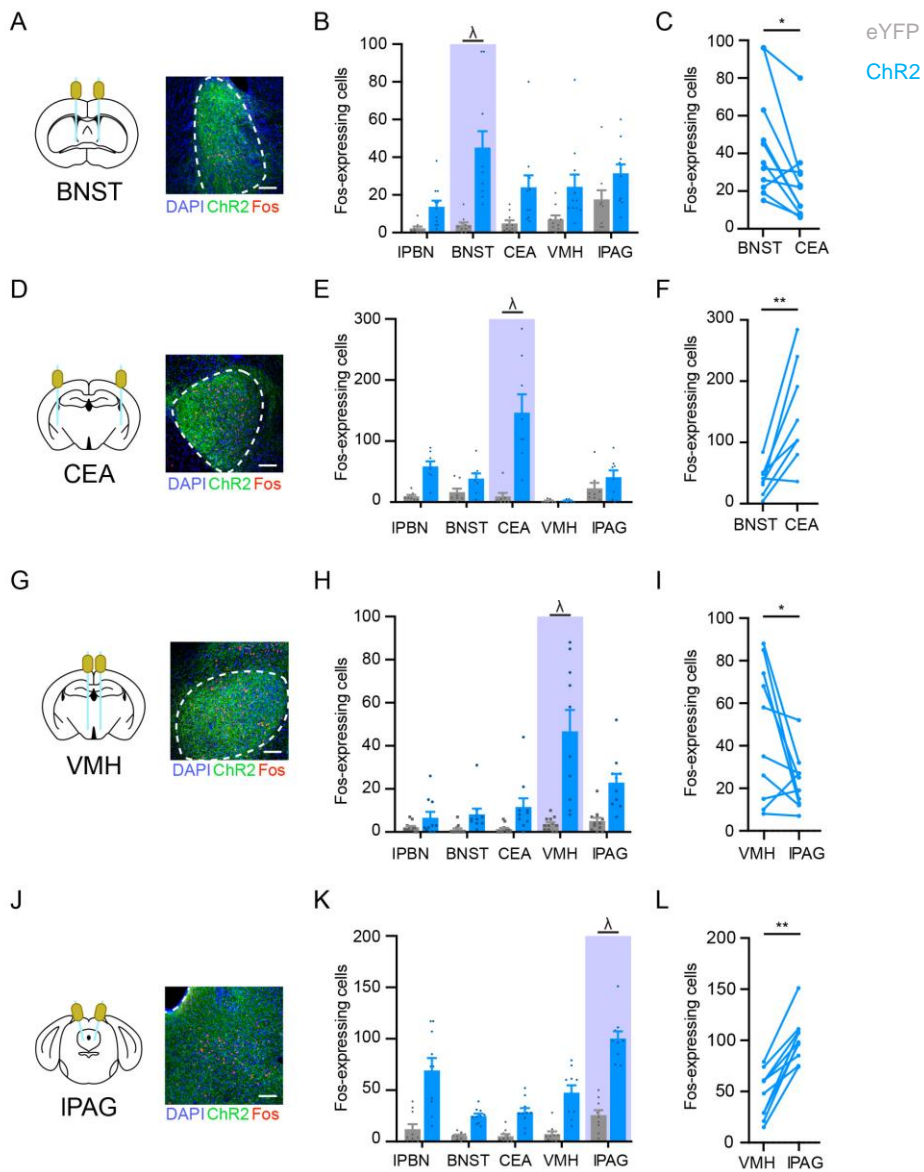

**Figure S2. Pathway selective photostimulation revealed through Opto-Fos experiments.**

To assess the degree to which photostimulation of a specific IPBN efferent was selective, Fos induction was analyzed 90 min after photostimulation (20 min; 20 Hz, 5 ms pulses, 10 mW). **(A)** Diagram and image of ChR2-expressing terminals and Fos-expressing cells in BNST. **(B)** Fos induction in eYFP-expressing mice (control, grey) and ChR2-expressing mice (blue) upon photostimulation of IPBN efferent terminals in the BNST. Data are mean  $\pm$  SEM and dots represent data points from individual animals ( $n = 8 - 11$  mice per group). **(C)** The number of Fos-expressing cells in BNST is significantly greater than that in CEA (paired Student's t-test  $p = 0.01$ ,  $n = 11$  mice).

**(D)** Diagram and image of ChR2-expressing terminals and Fos-expressing cells in CEA. **(E)** Fos induction in eYFP-expressing mice (control, grey) and ChR2-expressing mice (blue) upon photostimulation of IPBN efferent terminals in the CEA. Data are mean  $\pm$  SEM and dots represent data points from individual animals ( $n = 8 - 9$  mice per group) **(F)** The number of Fos-expressing cells in CEA is significantly greater than that in BNST (paired Student's t-test  $p = 0.004$ ,  $n = 9$  mice).

**(G)** Diagram and image of ChR2-expressing terminals and Fos-expressing cells in VMH. **(H)** Fos induction in eYFP-expressing mice (control, grey) and ChR2-expressing mice (blue) upon photostimulation of IPBN efferent terminals in the VMH. Data are mean  $\pm$  SEM and dots represent data points from individual animals ( $n = 10 - 11$  mice per group). **(I)** The number of Fos-expressing cells in VMH is significantly greater than that in IPAG (paired Student's t-test,  $p = 0.04$ ,  $n = 10$ ).

**(J)** Diagram and image of ChR2-expressing terminals and Fos-expressing cells in VMH. **(K)** Fos induction in eYFP-expressing mice (control, grey) and ChR2-expressing mice (blue) upon photostimulation IPBN efferent terminals in the VMH. Data are mean  $\pm$  SEM and dots represent data points from individual animals ( $n = 9 - 10$  mice per group) **(L)** The number of Fos-expressing cells in IPAG is significantly greater than that in VMH (paired Student's t-test  $p = 0.004$ ,  $n = 9$ ). Scale bar = 100  $\mu$ m (A, D, G, J)

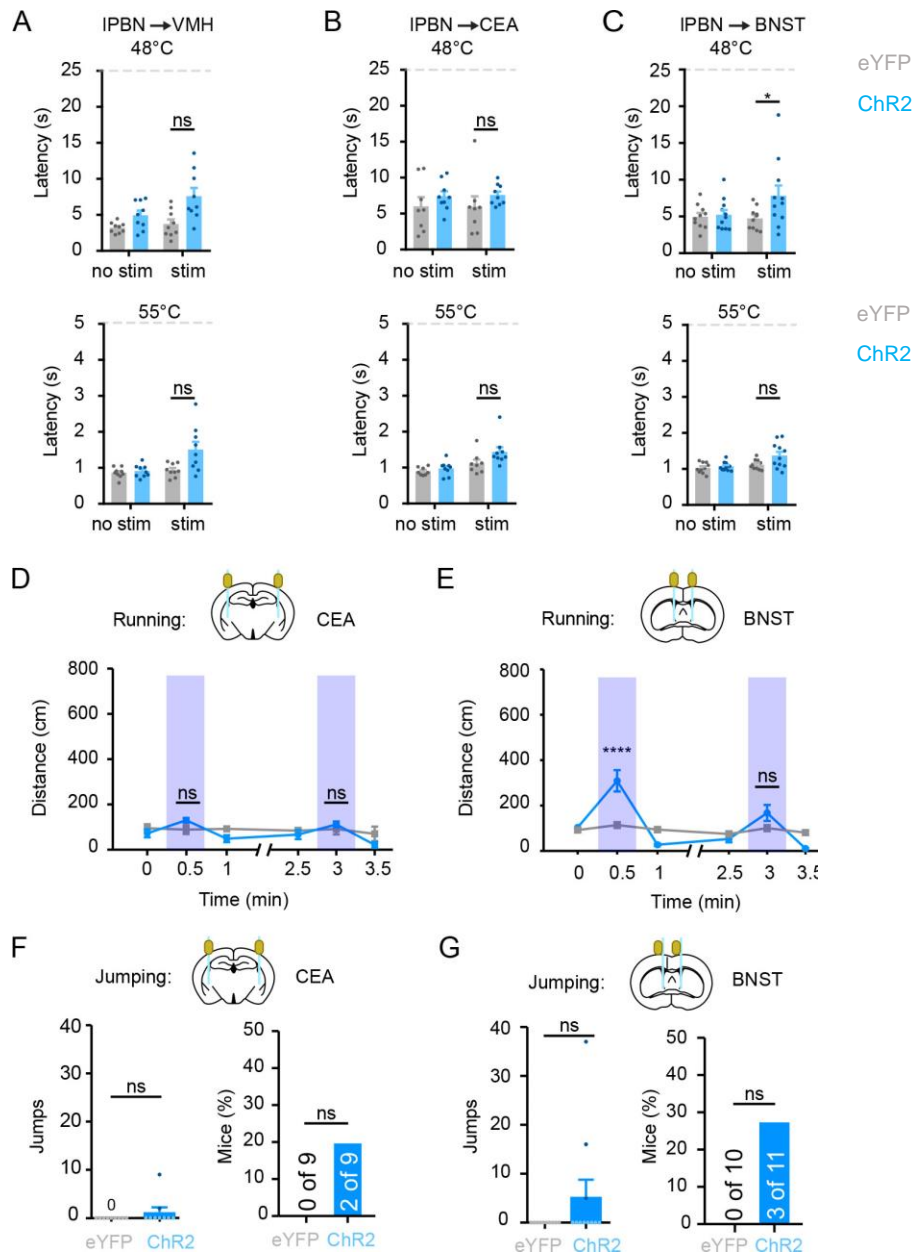

**Figure S3. Effect of photoactivation of IPBN efferents on descending modulation, running, and jumping.**

**(A-B)** Optogenetic activation of terminals in VMH or CEA of ChR2-injected mice (blue bars) does not increase latency of tail flick response to low or high noxious heat compared to eYFP-expressing controls (grey). Data are mean  $\pm$  SEM and dots represent data points from individual animals ( $n = 8 - 9$  mice per group; ns, not significant  $p > 0.05$ , two-way RM ANOVA). **(C)** Photostimulation of projections to BNST in ChR2-expressing mice (blue bars) increases latency to tail flick at 48 °C but not 55 °C compared to control mice (grey bars). Data are mean  $\pm$  SEM and dots represent data points from individual animals ( $n = 10 - 11$  mice per group; \* indicates significant, two-way RM ANOVA followed by Holm-Sidak post-hoc test,  $p = 0.03$ ).

**(D)** Optogenetic stimulation of terminals in CEA of ChR2-injected mice has no effect on lateral movement. Data are mean  $\pm$  SEM ( $n = 8 - 9$  mice per group; ns, not significant, two-way RM ANOVA,  $p > 0.05$ ). **(E)** Optogenetic stimulation of terminals in BNST promotes significant lateral movement in the first but not second bout of photostimulation. Data are mean  $\pm$  SEM ( $n = 10 - 11$  mice per group, \*\*\*\* indicates significant difference, two-way RM ANOVA followed by Holm-Sidak post-hoc test,  $p < 0.0001$ ).

**(F - G)** The number of jumps or proportion of mice exhibiting jumping was not significantly higher in ChR2-expressing mice that were stimulated in CEA or BNST compared to eYFP controls (Mann-Whitney t-test: CEA:  $p = 0.47$ ; BNST:  $p = 0.21$ , Fisher's exact test: CEA:  $p = 0.47$ ; BNST:  $p = 0.21$ ). Data are mean  $\pm$  SEM and dots represent data points from individual animals ( $n = 9 - 11$  mice per group).

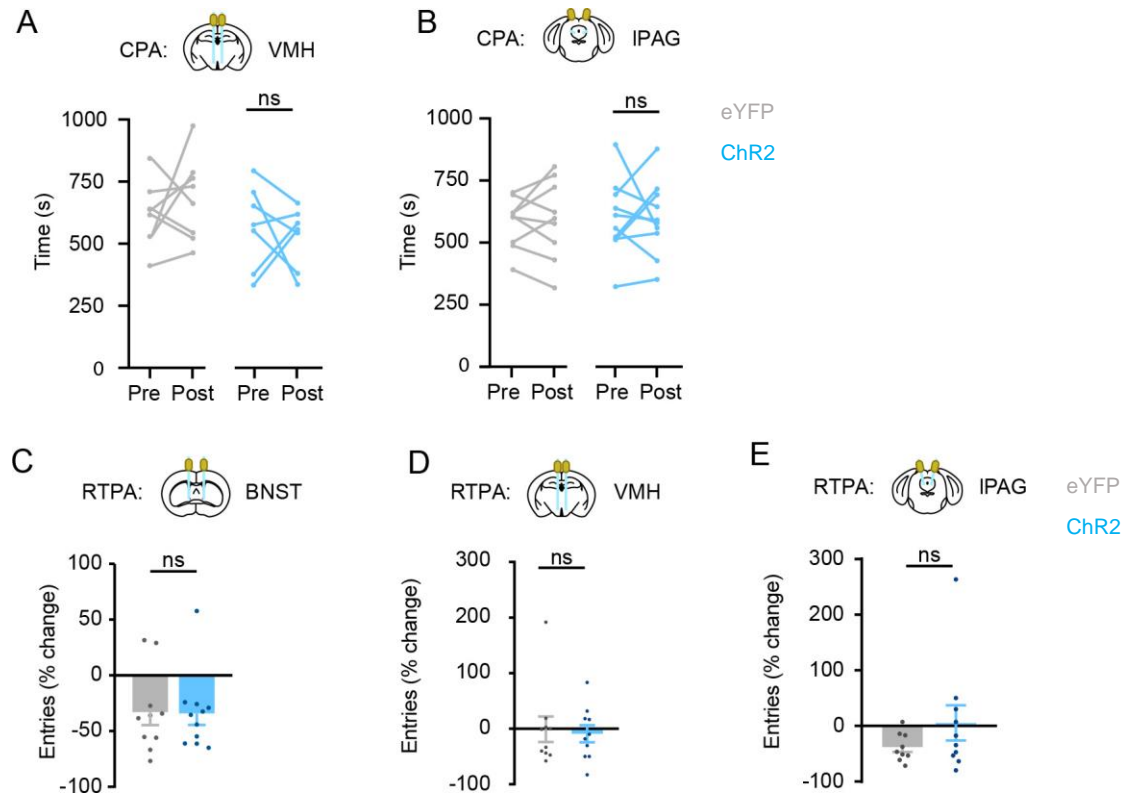

**Figure S4. Optogenetic stimulation of IPBN efferents and aversive memory.**

**(A-B)** Optogenetic activation of terminals in VMH (A) or IPAG (B) of ChR2-injected mice does not cause CPA (paired Student's t-test: VMH:  $p = 0.605$ ; IPAG:  $p = 0.986$ ). Data are from individual mice ( $n = 7 - 9$  mice per condition).

**(C-E)** Optogenetic activation of ChR2-expressing efferents terminals in BNST (C), VMH (D), or IPAG (E) does not affect the number of entries into the photostimulation chamber during RTPA (Student's t-test, BNST:  $p = 0.942$ ; VMH:  $p = 0.772$ ; IPAG:  $p = 0.219$ ). Data are mean  $\pm$  SEM and dots represent data points from individual animals ( $n = 9 - 11$  mice per group).

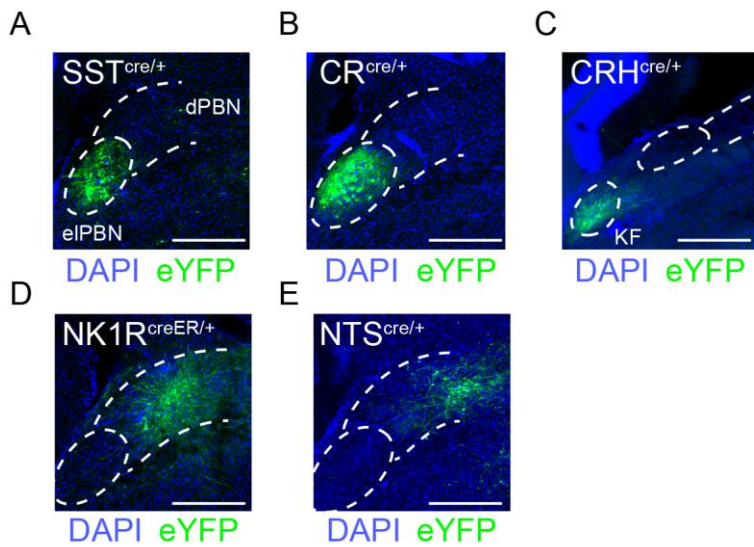

**Figure S5. Screen of putative cell-type specific IPBN subpopulations**

AAV encoding a fluorescently-tagged channelrhodopsin (0.5 $\mu$ l, bilateral) was injected into the IPBN of the following genetic mice harboring knock-in alleles for Cre-recombinase: **(A)** Somatostatin (SST-cre, Taniguchi et al. 2011). **(B)** Calretinin (CR-cre, Taniguchi et al. 2011). **(C)** Corticotropin releasing hormone (CRH-cre, Taniguchi et al. 2011). **(D)** Neurokinin-1 receptor (NK1R-creER, Huang et al. 2016). **(E)** Neurotensin (NTS-cre, Leininger et al. 2011). Scale bar = 200  $\mu$ m (A - E).

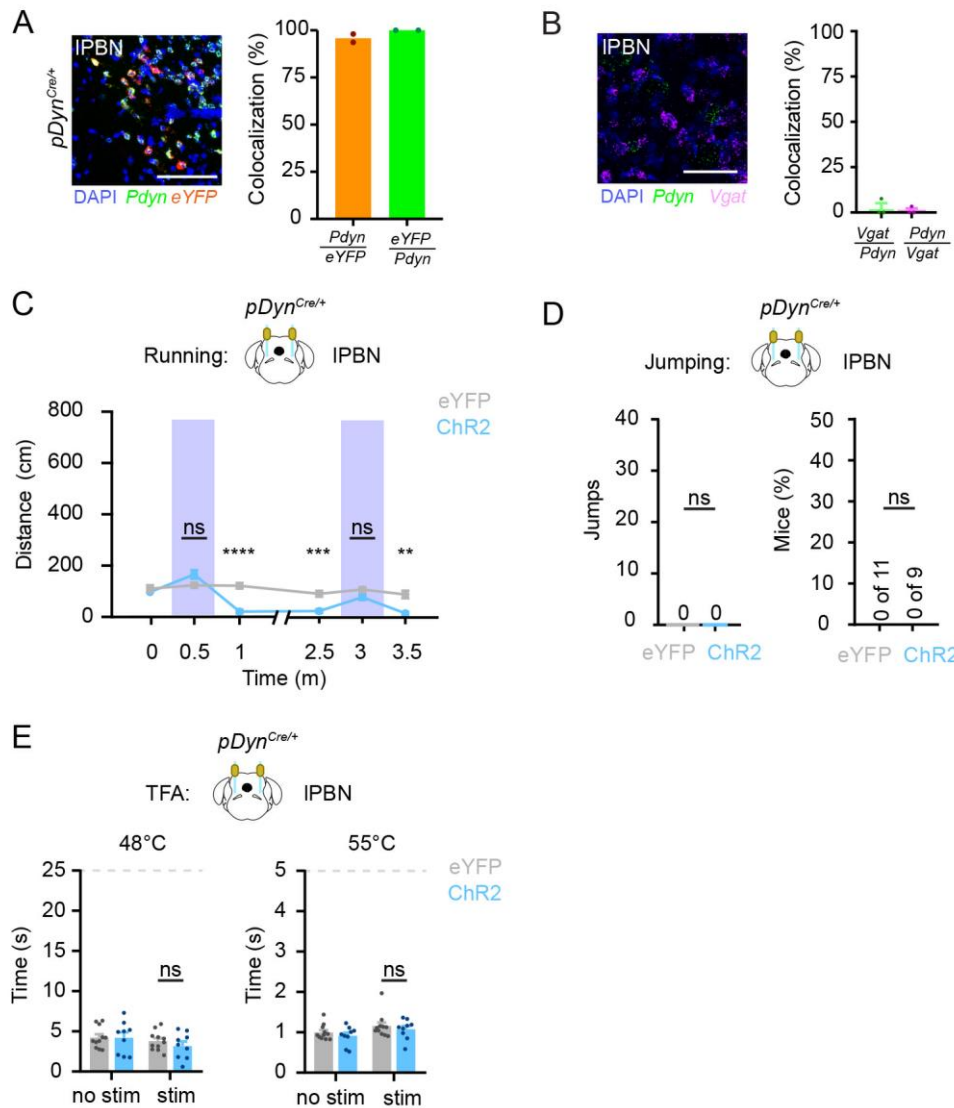

**Figure S6. Analysis of *Pdyn* neurons in the IPBN and the effect of activating them.**

**(A)** Representative image (left) and quantification (right) of IPBN in  $pDyn^{Cre}$  mice injected with an AAV encoding Cre-dependent eYFP into the IPBN and subsequently analyzed by dual FISH using probes targeting *Pdyn* and *eYFP*. Data are mean and dots represent data points from individual animals ( $n = 2$  mice).

**(B)** Representative image (left) and quantification (right) of the IPBN using dual FISH with probes targeting *Pdyn* and *Vgat*. Data are mean and dots represent data points from individual animals ( $n = 3$  mice).

**(C)** Optogenetic stimulation of ChR2-expressing  $pDyn^{Cre}$  neurons in IPBN does not induce lateral locomotion (two-way RM ANOVA followed by Holm-Sidak post-hoc test,  $F(5, 90) = 17.21$ ).

**(D)**  $pDyn^{Cre}$  ChR2-injected mice do not jump when photostimulated.

**(E)** Optogenetic stimulation of ChR2-expressing  $pDyn^{Cre}$  neurons in IPBN does not increase tail flick latency at  $48^\circ\text{C}$  (two-way RM ANOVA,  $F(1, 18) = 0.6300$ ) or  $55^\circ\text{C}$  (two-way RM ANOVA,  $F(1, 18) = 0.004203$ ) compared to control mice. Data represent mean  $\pm$  SEM. Scale bar =  $50 \mu\text{m}$  (A - B)



## Supplemental Methods

### Animals

The following were obtained from Jackson Laboratory: SST-cre (Taniguchi et al., 2011) stock: 013044), CR-cre (Taniguchi et al., 2011) stock: 010774), CRH-cre (Taniguchi et al., 2011) stock: 012704), and NTS-cre (Leininger et al., 2011) stock: 017525) were obtained from Jackson Laboratories. KOR-cre was developed in the Ross lab (Snyder et al., 2018).

### Fos Induction

To induce Fos in optically implanted mice, mice were photostimulated at 10mW, 20Hz, and 5ms pulse duration for 20 minutes at a 3 seconds on, 2 seconds off stimulation pattern and subsequently perfused 90 minutes after the initial onset of photostimulation as noted for immunohistochemistry. 65um thick transverse sections of brain were collected on a vibratome and processed free-floating for immunohistochemistry as detailed in **Methods**. To quantify Fos-labeled cells, 3 optical plains separated by 10µm from the center of each section was merged into a single layer and counted for each region of interest (IPBN, BNST, CEA, VMH, and IPAG).

### References

Leininger, G.M., Opland, D.M., Jo, Y.H., Faouzi, M., Christensen, L., Cappellucci, L.A., Rhodes, C.J., Gnegy, M.E., Becker, J.B., Pothos, E.N., *et al.* (2011). Leptin action via neurotensin neurons controls orexin, the mesolimbic dopamine system and energy balance. *Cell Metab* 14, 313-323.

Snyder, L.M., Chiang, M.C., Loeza-Alcocer, E., Omori, Y., Hachisuka, J., Sheahan, T.D., Gale, J.R., Adelman, P.C., Sypek, E.I., Fulton, S.A., *et al.* (2018). Kappa Opioid Receptor Distribution and Function in Primary Afferents. *Neuron* 99, 1274-1288 e1276.

Taniguchi, H., He, M., Wu, P., Kim, S., Paik, R., Sugino, K., Kvitsiani, D., Fu, Y., Lu, J., Lin, Y., *et al.* (2011). A resource of Cre driver lines for genetic targeting of GABAergic neurons in cerebral cortex. *Neuron* 71, 995-1013.
